# Supplementary material for: Detection of pks Island mRNAs Using Toehold Sensors in Escherichia coli
Source: MDPI journal article supplement (doi:10.3390/life11111280), 2021-11-22
Supplement: s1 [file s1]

Supplementary

# Detection of *pks* Island mRNAs Using Toehold Sensors in *Escherichia coli*

Taeyang Heo <sup>1,†</sup>, Hansol Kang <sup>1,†</sup>, Seungdo Choi <sup>1,†</sup>, Jongmin Kim <sup>1,\*</sup>

<sup>1</sup> Department of Life Sciences, Pohang University of Science and Technology, Pohang 37673, Korea; hty1998@postech.ac.kr (T.H.); hskang0405@postech.ac.kr (H.K.); choisd@postech.ac.kr (S.C.); jongmin.kim@postech.ac.kr (J.K.)

† Equal contribution: Taeyang Heo, Hansol Kang, Seungdo Choi

\* Correspondence: jongmin.kim@postech.ac.kr

## Detailed Experimental Protocols

### Plasmid construction

Plasmids were constructed using circular polymerase extension cloning (CPEC) [1], Gibson assembly [2] and round-the-horn site-directed mutagenesis [3]. All DNA templates for helper-assisted mRNA sensing circuit and our algorithm-based mRNA sensor design were obtained by oligonucleotide synthesis. The synthetic DNA strands were PCR amplified and inserted into plasmid backbones. All plasmids were cloned in the *E. coli* DH5a strain and validated through DNA Sequencing. Backbones for the plasmids were taken from the commercial vectors pET15b, pCDFDuet, and pCOLADuet (EMD Millipore). GFPmut3b\_ASV was used as the reporter [4], and the ASV degradation tag addition were done by round-the-horn site-directed mutagenesis. Sequences of elements commonly used in the plasmids are provided in Table S5–S9.

### Microplate reader analysis

For the in vivo validation of *mCherry* mRNA sensors (Figure S1), 200 µL of cell cultures after 0.2 % arabinose (*w/v*) induction were added per well on a 96-well Black Plate 33396 (SPL). GFP fluorescence (excitation: 479 nm, emission: 520 nm), *mCherry* fluorescence (excitation: 587 nm, emission: 610 nm) and OD600 were measured at a Synergy H1 microplate reader (Biotek) running Gen5 3.08 software. GFP and *mCherry* fluorescence levels were normalized as follows: Fluorescence of LB blank was subtracted for background normalization, and a measured fluorescence value was divided by its OD600. The number of biological replicates was three for in vivo experiments.

## Supplementary Tables

**Supplementary Table S1.** Plasmids used in this study. Abbreviations are as follows: pT7 = T7 promoter, T7term = T7 terminator, AmpR = ampicillin resistance gene, SpecR = spectinomycin resistance gene, kanR = kanamycin resistance gene. All the target mRNAs, sensor RNAs and helper RNAs were cloned into pET15b, pCOLADUET, pCDFDUET plasmid, respectively.

| Name            | Sequence                                                    |
|-----------------|-------------------------------------------------------------|
| Cognate trigger | pT7–Cognate trigger–T7term–AmpR–pBR322 origin–LacI          |
| Sensor          | pT7–Sensor–Linker–GFPmut3b_ASV–T7term–kanR–ColA origin–LacI |
| Helper          | pT7–Helper–T7term–SpecR–CloDF origin–LacI                   |

**Supplementary Table S2.** Examples of DNA plasmid sequences. Replication origin and LacI was reversely oriented to other elements.

| Name (architecture)                                                                                                  | Sequence                                                                                                                                                                                                                                                                                                                                                                                                                                                                                                                                                                                                                                                                                                                                                                                                                                                                                                                                                                                                                                                                                                                                                                                                                                                                                                                                                                                                                                                                                                                                                                                                                                                                                                                                                                                                                                                                                                                                                                                                                                                                                                                                                                                                                                    |
|----------------------------------------------------------------------------------------------------------------------|---------------------------------------------------------------------------------------------------------------------------------------------------------------------------------------------------------------------------------------------------------------------------------------------------------------------------------------------------------------------------------------------------------------------------------------------------------------------------------------------------------------------------------------------------------------------------------------------------------------------------------------------------------------------------------------------------------------------------------------------------------------------------------------------------------------------------------------------------------------------------------------------------------------------------------------------------------------------------------------------------------------------------------------------------------------------------------------------------------------------------------------------------------------------------------------------------------------------------------------------------------------------------------------------------------------------------------------------------------------------------------------------------------------------------------------------------------------------------------------------------------------------------------------------------------------------------------------------------------------------------------------------------------------------------------------------------------------------------------------------------------------------------------------------------------------------------------------------------------------------------------------------------------------------------------------------------------------------------------------------------------------------------------------------------------------------------------------------------------------------------------------------------------------------------------------------------------------------------------------------|
| <i>mCherry</i> mRNA (pT7–RBS– <i>mCherry</i> –T7term–(Bla Promoter)–AmpR–pBR322 origin–backbone–LacI–(Lac promoter)) | <p>TAATACGACTCACTATAGGGGAATTGTGAGCGGATAACAATTCCCCTCTAG</p> <p>AAATAATTTTGTTTAACTTTAAGAAGGAGATATACCATGGGCAGCAGCCAT</p> <p>CATCATCATCATCACAGCAGCGGCCTGGTGCCGCGCGGCAGCCATATGCGT</p> <p>AAAATGGTGAGCAAGGGCGAAGAAGATAACATGGCCATCATCAAGGAGT</p> <p>TCATGCGCTTCAAGGTTACATGGAGGGCTCCGTGAACGGCCACGAGTTTCG</p> <p>AGATCGAGGGCGAGGGCGAGGGCCGCCCTACGAGGGCACCCAGACCGC</p> <p>CAAGCTGAAGGTGACCAAGGGTGGCCCCCTGCCCTTCGCCTGGGACATCCT</p> <p>GTCCCCTCAGTTCATGTACGGCTCCAAGGCCTACGTGAAGCACCCGCGCA</p> <p>CATCCCCGACTACTTGAAGCTGTCCTTCCCCGAGGGCTTCAAGTGGGAGCG</p> <p>CGTGATGAACCTTCGAGGACGGCGGCGTGGTGACCGTGACCCAGGACTCCT</p> <p>CCCTGCAAGACGGCGAGTTCATCTACAAGGTGAAGCTGCGCGGCACCAAC</p> <p>TTCCCCTCCGACGGCCCCGTAATGCAGAAGAAGACTATGGGCTGGGAGGC</p> <p>CTCCTCCGAGCGGATGTACCCCGAGGACGGCGCGCTGAAGGGCGAGATCA</p> <p>AGCAGAGGCTGAAGCTGAAGGACGGCGGCCACTACGACGCTGAGGTCAA</p> <p>GACCACCTACAAGGCCAAGAAGCCCGTGCAACTGCCCGGCGCGTACAACG</p> <p>TCAACATCAAGTTGACATCACCTCCCAACAGGAGTACACCATCGTG</p> <p>GAACAGTACGAACGCGCCGAGGGCCGCCACTCCACCGGCGGCATGGACG</p> <p>AGCTGTACAAGTAACTAGCATAAACCCTTGGGGCCTCTAAACGGGTCTTGA</p> <p>GGGGTTTTTTGCTGAAAGGAGGAACTATATCCGGATATCCCGCAAGAGGCC</p> <p>CGGCAGTACCGGCATAACCAAGCCTATGCCTACAGCATCCAGGGTGACGG</p> <p>TGCCGAGGATGACGATGAGCGCATTGTTAGATTTTCATACACGGTGCCTGAC</p> <p>TGCGTTAGCAATTTAACTGTGATAAACTACCGCATTAAGCTTATCGATGA</p> <p>TAAGCTGTCAAACATGAGAATTCTTGAAGACGAAAGGGCCTCGTGATACG</p> <p>CCTATTTTTATAGGTTAATGTCATGATAATAATGGTTTCTTAGACGTCAGGT</p> <p>GGCACTTTTTCGGGGAAATGTGCGCGGAACCCCTATTGTGTTATTTTCTAAA</p> <p>TACATTCAAATATGTATCCGCTCATGAGACAATAACCCTGATAAATGCTTC</p> <p>AATAATATTGAAAAAGGAAGAGTATGAGTATTCAACATTTCCGTGTCGCC</p> <p>TTATTCCTTTTTTTCGGCATTTTGCTTCTGTTTTTGTCTACCCAGAAACG</p> <p>CTGGTGAAAGTAAAAGATGCTGAAGATCAGTTGGGTGCACGAGTGGGTTA</p> <p>CATCGAACTGGATCTCAACAGCGGTAAGATCCTTGAGAGTTTTTCGCCCCGA</p> <p>AGAACGTTTTCCAATGATGAGCACTTTTAAAGTTCTGCTATGTGGCGCGGT</p> <p>ATTATCCCGTGTTGACGCCGGGCAAGAGCAACTCGGTGCGGCATACACTA</p> <p>TTCTCAGAATGACTTGGTTGAGTACTACCAGTCACAGAAAAGCATCTTAC</p> <p>GGATGGCATGACAGTAAGAGAATTATGCAGTGCTGCCATAACCATGAGTG</p> <p>ATAACACTGCGGCCAACTTACTTCTGACAACGATCGGAGGACCGAAGGAG</p> <p>CTAACCGCTTTTTTGCACAACATGGGGGATCATGTAACCTGCCTTGATCGTT</p> <p>GGGAACCGGAGCTGAATGAAGCCATACCAACGACGAGCGTGACACCAC</p> |

GATGCCTGCAGCAATGGCAACAACGTTGCGCAAACCTATTAACCTGGCGAAC  
TACTTACTCTAGCTTCCCGGCAACAATTAATAGACTGGATGGAGGCGGATA  
AAGTTGCAGGACCCTTCTGCGCTCGGCCCTTCCGGCTGGCTGGTTTATTGC  
TGATAAATCTGGAGCCGGTGAGCGTGGGTCTCGCGGTATCATTGCAGCACT  
GGGGCCAGATGGTAAGCCCTCCCGTATCGTAGTTATCTACACGACGGGGA  
GTCAGGCAACTATGGATGAACGAAATAGACAGATCGCTGAGATAGGTGCC  
TCACTGATTAAGCATTGGTAACTGTCAGACCAAGTTTACTCATATATACTTT  
AGATTGATTTAAACTTCATTTTTTAATTTAAAGGATCTAGGTGAAGATCCT  
TTTTGATAATCTCATGACCAAAATCCCTTAACGTGAGTTTTCGTTCCACTGA  
GCGTCAGACCCCGTAGAAAAGATCAAAGGATCTTCTTGAGATCCTTTTTTT  
CTGCGCGTAATCTGCTGCTTGCAAACAAAAAAACCACCGCTACCAGCGGT  
GGTTTGTTTGCCGGATCAAGAGCTACCAACTCTTTTTCCGAAGGTAACTGGC  
TTCAGCAGAGCGCAGATACCAAATACTGTCTTCTAGTGTAGCCGTAGTTA  
GGCCACCACTTCAAGAACTCTGTAGCACCGCCTACATACCTCGCTCTGCTA  
ATCCTGTTACCAGTGGCTGCTGCCAGTGGCGATAAGTCGTGTCTTACCGGG  
TTGGACTCAAGACGATAGTTACCGGATAAGGCGCAGCGGTCCGGCTGAAC  
GGGGGGTTCGTGCACACAGCCAGCTTGAGCGAACGACCTACACCGAAC  
TGAGATACCTACAGCGTGAGCTATGAGAAAGCGCCACGCTTCCCGAAGGG  
AGAAAGGCGGACAGGTATCCGGTAAGCGGCAGGGTCGGAACAGGAGAGC  
GCACGAGGGAGCTTCCAGGGGGAACGCCTGGTATCTTTATAGTCCTGTGC  
GGTTTCGCCACCTCTGACTTGAGCGTCGATTTTTGTGATGCTCGTCAGGGGG  
GCGGAGCCTATGGAAAACGCCAGCAACGCGGCCTTTTTACGGTTCCTGGC  
CTTTTGCTGGCCTTTTGCTCACATGTTCTTTCCTGCGTTATCCCCTGATTCTGT  
GGATAACCGTATTACCGCCTTTGAGTGAGCTGATACCGCTCGCCGCAGCCG  
AACGACCGAGCGCAGCGAGTCAGTGAGCGAGGAAGCGGAAGAGCGCCTG  
ATGCGGTATTTTCTCCTTACGCATCTGTGCGGTATTTACACCCGCATATATG  
GTGCACTCTCAGTACAATCTGCTCTGATGCCGCATAGTTAAGCCAGTATAC  
ACTCCGCTATCGCTACGTGACTGGGTCATGGCTGCGCCCCGACACCCGCCA  
ACACCCGCTGACGCGCCCTGACGGGCTTGTCTGCTCCCGGCATCCGCTTAC  
AGACAAGCTGTGACCGTCTCCGGGAGCTGCATGTGTGAGAGGTTTTACCG  
TCATCACCGAAACGCGCGAGGCAGCTGCGGTAAAGCTCATCAGCGTGGTC  
GTGAAGCGATTACAGATGTCTGCCTGTTTCATCCGCGTCCAGCTCGTTGAGT  
TTCTCCAGAAGCGTTAATGTCTGGCTTCTGATAAAGCGGGCCATGTTAAGG  
GCGGTTTTTTCCTGTTTGGTCACTGATGCCTCCGTGTAAGGGGGATTCTGTT  
CATGGGGGTAATGATACCGATGAAACGAGAGAGGATGCTCACGATACGGG  
TACTGATGATGAACATGCCCGGTTACTGGAACGTTGTGAGGGTAAACAAC  
TGGCGGTATGGATGCGGCGGGACCAGAGAAAAATCACTCAGGGTCAATGC  
CAGCGCTTCGTTAATACAGATGTAGGTGTTCCACAGGGTAGCCAGCAGCAT  
CCTGCGATGCAGATCCGGAACATAATGGTGCAGGGCGCTGACTTCCGCGTT  
TCCAGACTTTACGAAACACGGAACCGAAGACCATTCATGTTGTTGCTCAG  
GTCGCAGACGTTTTGCAGCAGCAGTCGCTTACGTTCCGCTCGCGTATCGGT  
GATTCATTCTGCTAACCAGTAAGGCAACCCCGCCAGCCTAGCCGGGTCTC  
AACGACAGGAGCACGATCATGCGCACCCGTGGCCAGGACCCAACGCTGCC  
CGAGATGCGCCGCGTGCGGCTGCTGGAGATGGCGGACGCGATGGATATGT  
TCTGCCAAGGGTTGGTTTGCGCATTCACAGTTCTCCGCAAGAATTGATTGGC  
TCCAATTCTTGGAGTGGTGAATCCGTTAGCGAGGTGCCGCCGGCTTCCATTC  
AGGTCGAGGTGGCCCGGCTCCATGCACCGCGACGCAACGCGGGGAGGCAG  
ACAAGGTATAGGGCGGCGCCTACAATCCATGCCAACCCGTTCCATGTGCTC  
GCCGAGGCGGCATAAAATCGCCGTGACGATCAGCGGTCCAGTGATCGAAGT  
TAGGCTGGTAAGAGCCGCGAGCGATCCTTGAAGCTGTCCCTGATGGTCGTC  
ATCTACCTGCCTGGACAGCATGGCCTGCAACGCGGGCATCCCGATGCCGCC

|                                                                                                                                                 |                                                                                                                                                                                                                                                                                                                                                                                                                                                                                                                                                                                                                                                                                                                                                                                                                                                                                                                                                                                                                                                                                                                                                                                                                                                                                                                                                                                                                                                                                                                                                                                                                                                                                                                                                                                                                                                                                                                                                                                                                                                                                     |
|-------------------------------------------------------------------------------------------------------------------------------------------------|-------------------------------------------------------------------------------------------------------------------------------------------------------------------------------------------------------------------------------------------------------------------------------------------------------------------------------------------------------------------------------------------------------------------------------------------------------------------------------------------------------------------------------------------------------------------------------------------------------------------------------------------------------------------------------------------------------------------------------------------------------------------------------------------------------------------------------------------------------------------------------------------------------------------------------------------------------------------------------------------------------------------------------------------------------------------------------------------------------------------------------------------------------------------------------------------------------------------------------------------------------------------------------------------------------------------------------------------------------------------------------------------------------------------------------------------------------------------------------------------------------------------------------------------------------------------------------------------------------------------------------------------------------------------------------------------------------------------------------------------------------------------------------------------------------------------------------------------------------------------------------------------------------------------------------------------------------------------------------------------------------------------------------------------------------------------------------------|
|                                                                                                                                                 | <p>GGAAGCGAGAAGAATCATAATGGGGAAGGCCATCCAGCCTCGCGTCGCGA<br/> ACGCCAGCAAGACGTAGCCAGCGCGTCGGCCGCCATGCCGGCGATAATG<br/> GCCTGCTTCTCGCCGAAACGTTTGGTGGCGGGACCAGTGACGAAGGCTTGA<br/> GCGAGGGCGTGCAAGATTCCGAATACCGCAAGCGACAGGCCGATCATCGT<br/> CGCGCTCCAGCGAAAGCGGTCTCTCGCCGAAAATGACCCAGAGCGCTGCCG<br/> GCACCTGTCTACGAGTTGCATGATAAAGAAGACAGTCATAAGTGCGGCG<br/> ACGATAGTCATGCCCCGCGCCACCGGAAGGAGCTGACTGGGTGAAGGC<br/> TCTCAAGGGCATCGGTTCGAGATCCCGGTGCCTAATGAGTGAGCTAACTTAC<br/> ATTAATTGCGTTGCGCTCACTGCCCGCTTTCCAGTCGGGAAACCTGTCTGC<br/> CAGCTGCATTAATGAATCGGCCAACGCGCGGGGAGAGGCGGTTTTCGTAT<br/> TGGGCGCCAGGGTGGTTTTTCTTTTACCAGTGAGACGGGCAACAGCTGAT<br/> TGCCCTTACCAGCTGGCCCTGAGAGAGTTGCAGCAAGCGGTCCACGCTGG<br/> TTTGCCCCAGCAGGCGAAAATCCTGTTTGGTGGTTAACGGCGGGATAT<br/> AACATGAGCTGTCTTCGGTATCGTCGTATCCCACTACCGAGATATCCGCAC<br/> CAACGCGCAGCCCGGACTCGGTAATGGCGCGCATTGCGCCCAGCGCCATC<br/> TGATCGTTGGCAACCAGCATCGCAGTGGGAACGATGCCCTCATTACGATT<br/> TGCATGGTTTGTGAAAACCGGACATGGCACTCCAGTCGCCTTCCCGTTCC<br/> GCTATCGGCTGAATTTGATTGCGAGTGAGATATTTATGCCAGCCAGCCAGA<br/> CGCAGACGCGCCGAGACAGAACTTAATGGGCCCGCTAACAGCGCGATTG<br/> CTGGTGACCCAATGCGACCAGATGCTCCACGCCAGTCGCGTACCGTCTTC<br/> ATGGGAGAAAATAATACTGTTGATGGGTGTCTGGTCAGAGACATCAAGAA<br/> ATAACGCCGGAACATTAGTGCAGGCAGCTTCCACAGCAATGGCATCCTGG<br/> TCATCCAGCGGATAGTTAATGATCAGCCCACTGACGCGTTGCGCGAGAAG<br/> ATTGTGCACCGCCGCTTTACAGGCTTCGACGCCGCTTCGTTCTACCATCGAC<br/> ACCACCACGCTGGCACCCAGTTGATCGGCGCGAGATTTAATCGCCGCGAC<br/> AATTTGCGACGGCGCGTGCAGGGCCAGACTGGAGGTGGCAACGCCAATCA<br/> GCAACGACTGTTTGCCCGCCAGTTGTTGTGCCACGCGGTTGGGAATGTAAT<br/> TCAGTCCGCCATCGCCGCTTCCACTTTTTCCCGCGTTTTTCGAGAAACGTG<br/> GCTGGCCTGTTTACCACGCGGGAAACGGTCTGATAAGAGACACCGGCAT<br/> ACTCTGCGACATCGTATAACGTTACTGGTTTACATTACCAACCCTGAATTG<br/> ACTCTCTTCCGGGCGCTATCATGCCATACCGCGAAAGGTTTTGCGCCATTCCG<br/> ATGGTGTCCGGGATCTCGACGCTCTCCCTTATGCGACTCCTGCATTAGGAA<br/> GCAGCCAGTAGTAGGTTGAGGCCGTTGAGCACCGCCGCCGCAAGGAATG<br/> GTGCATGCAAGGAGATGGCGCCCAACAGTCCCCCGCCACGGGGCCTGCC<br/> ACCATACCCACGCCGAAACAAGCGCTCATGAGCCCGAAGTGCGGAGCCCCG<br/> ATCTTCCCCATCGGTGATGTCCGCGAAAT</p> |
| <p>Sensor RNA (pT7–Sensor C(RBS)–<br/> Linker–GFPmut3b_ASV–T7term–<br/> kanR–(Bla Promoter)–ColA origin–<br/> backbone–LacI–(Lac promoter))</p> | <p>TAATACGACTCACTATAGGGTGTGGGAGGTGATGTCCAACCTGATGTTGAC<br/> GTTGTGTTATAGTTATGAGACAAGAACAGAGGAGACATAACATGAACACA<br/> ACGAACTGTGTTAACCTGGCGGCAGCGCAAAAGATGCGTAAAGGAGAAG<br/> AACTTTTCACTGGAGTTGTCCCAATTCTTGTTGAATTAGATGGTGATGTTAA<br/> TGGGCACAAATTTCTGTCAAGTGGAGAGGGTGAAGGTGATGCAACATACG<br/> GAAAACCTTACCCTTAAATTTATTTGCACTACTGGAAAACCTACCTGTTCCGTG<br/> GCCAACACTTGTCACTACTTTTCGGTTATGGTGTTCATGCTTTGCGAGATAC<br/> CCAGATCACATGAAACAGCATGACTTTTTCAAGAGTGCCATGCCCGAAGGT<br/> TACGTACAGGAAAGAACTATATTTTTCAAGATGACGGGAACTACAAGAC<br/> ACGTGCTGAAGTCAAGTTTGAAGGTGATACCCTTGTTAATAGAATCGAGTT<br/> AAAAGGTATTGATTTTAAAGAAGATGGAAACATTCTTGGACACAAATTGG<br/> AATACAACTATAACTCACACAATGTATACATCATGGCAGACAAACAAAAG<br/> AATGGAATCAAAGTTAACTTCAAAATTAGACACAACATTGAAGATGGAAG<br/> CGTTCAACTAGCAGACCATTATCAACAAAATACTCCGATTGGCGATGGCCC<br/> TGTCCTTTTACCAGACAACCATTACCTGTCCACACAATCTGCCCTTTCGAAA</p>                                                                                                                                                                                                                                                                                                                                                                                                                                                                                                                                                                                                                                                                                                                                                                                                                                                                                                                                                                                                                                                                                                                                                                                               |

GATCCCAACGAAAAGAGAGACCACATGGTCCTTCTTGAGTTTGTAACCGCT  
GCTGGGATTACACATGGCATGGATGAACTATACAAAAGGCCTGCAGCAAA  
CGACGAAAACACTACGCTGCATCAGTTTAATAAGATAAACAGAGCGGCACG  
GCAAGCAGAGTATACGAGATTCGGTAGCCACCGCTGAGCAATAACTAGCA  
TAACCCCTTGGGGCCTCTAAACGGGTCTTGAGGGGTTTTTTGCTGAAACCTC  
AGGCATTTGAGAAGCACACGGTCACACTGCTTCCGGTAGTCAATAAACCG  
GTAAACCAGCAATAGACATAAGCGGCTATTTAACGACCCTGCCCTGAACC  
GACGACAAGCTGACGACCGGGTCTCCGCAAGTGGCACTTTTCGGGGGAAAT  
GTGCGCGGAACCCCTATTTGTTTATTTTCTAAATACATTCAAATATGTATC  
CGCTCATGAATTAATTCTTAGAAAACTCATCGAGCATCAAATGAACTGC  
AATTTATTCATATCAGGATTATCAATACCATATTTTTGAAAAAGCCGTTTCT  
GTAATGAAGGAGAAAACTCACCGAGGCAGTTCCATAGGATGGCAAGATCC  
TGGTATCGGTCTGCGATTCCGACTCGTCCAACATCAATACAACCTATTAATT  
TCCCCTCGTCAAAAATAAGGTTATCAAGTGAGAAATCACCATGAGTGACG  
ACTGAATCCGGTGAGAATGGCAAAAGTTTATGCATTTCTTCCAGACTTGTT  
CAACAGGCCAGCCATTACGCTCGTCATCAAAATCACTCGCATCAACCAAA  
CCGTTATTCATTCTGTGATTGCGCCTGAGCGAGACGAAATACGCGGTGCTG  
TTAAAAGGACAATTACAAACAGGAATCGAATGCAACCGGCGCAGGAACA  
CTGCCAGCGCATCAACAATATTTTACCTGAATCAGGATATTCTTCTAATAC  
CTGGAATGCTGTTTTCCCGGGGATCGCAGTGGTGAGTAACCATGCATCATC  
AGGAGTACGGATAAAATGCTTGATGGTCGGAAGAGGCATAAATTCCGTCA  
GCCAGTTTAGTCTGACCATCTCATCTGTAACATCATTGGCAACGCTACCTTT  
GCCATGTTTCAGAAACAACTCTGGCGCATCGGGCTTCCCATACAATCGATA  
GATTGTCGCACCTGATTGCCCCGACATTATCGCGAGCCCATTTATACCCATAT  
AAATCAGCATCCATGTTGGAATTTAATCGCGGCCTAGAGCAAGACGTTTCC  
CGTTGAATATGGCTCATACTTTCTTTTCAATATTATTGAAGCATTATCA  
GGGTATTGTCTCATGAGCGGATACATATTTGAATGTATTTAGAAAAATAA  
ACAAATAGGCATGCTAGCGCAGAAACGTCCTAGAAGATGCCAGGAGGAT  
ACTTAGCAGAGAGACAATAAGGCCCGAGCGAAGCCGTTTTTCCATAGGCT  
CCGCCCCCTGACGAACATCACGAAATCTGACGCTCAAATCAGTGGTGGC  
GAAACCCGACAGGACTATAAAGATACCAGGCGTTTCCCCCTGATGGCTCC  
CTCTTGCGCTCTCCTGTTCCCGTCTGCGGCGTCCGTGTTGTGGTGGAGGCT  
TTACCCAAATCACACAGTCCCGTTCCGTGTAGACAGTTTCGCTCCAAGCTGG  
GCTGTGTGCAAGAACCCCCCGTTACAGCCGACTGCTGCGCCTTATCCGGTA  
ACTATCATCTTGAGTCCAACCCGAAAGACACGACAAAACGCCACTGGCA  
GCAGCCATTGGTAACTGAGAATTAGTGGATTTAGATATCGAGAGTCTTGAA  
GTGGTGGCCTAACAGAGGCTACACTGAAAGGACAGTATTTGGTATCTGCGC  
TCCACTAAAGCCAGTTACCAGGTTAAGCAGTTCCCCAACTGACTTAACCTT  
CGATCAAACCGCCTCCCCAGGCGGTTTTTTCGTTTACAGAGCAGGAGATTA  
CGACGATCGTAAAAGGATCTCAAGAAGATCCTTTACGGATTCCCGACACC  
ATCACTCTAGATTTAGTGCAATTTATCTCTTCAAATGTAGCACCTGAAGTC  
AGCCCCATACGATATAAGTTGTAATTCTCATGTTAGTCATGCCCCGCGCCC  
ACCGGAAGGAGCTGACTGGGTTGAAGGCTCTCAAGGGCATCGGTGAGAT  
CCCGGTGCCTAATGAGTGAGCTAACTTACATTAATTGCGTTGCGCTCACTG  
CCCGCTTTCCAGTCGGGAAACCTGTCGTGCCAGCTGCATTAATGAATCGGC  
CAACGCGCGGGGAGAGGCGGTTTTCGTATTGGGCGCCAGGGTGGTTTTTCT  
TTTACCAGTGAGACGGGCAACAGCTGATTGCCCTTACCGCCTGGCCCTG  
AGAGAGTTGCAGCAAGCGGTCCACGCTGGTTTGCCCCAGCAGGCGAAAAT  
CTGTTTGATGGTGGTTAACGGCGGGATATAACATGAGCTGTCTTCGGTATC  
GTCGTATCCCACTACCGAGATGTCCGCACCAACGCGCAGCCCGGACTCGGT  
AATGGCGCGCATTGCGCCAGCGCCATCTGATCGTTGGCAACCAGCATCGC

|                                                                                                                                    |                                                                                                                                                                                                                                                                                                                                                                                                                                                                                                                                                                                                                                                                                                                                                                                                                                                                                                                                                                                                                                                                                                                                                                                                                                                                                                                                                                                                                                                                                                                                                                                                                                                                                                                                                                                                                                                                                                                       |
|------------------------------------------------------------------------------------------------------------------------------------|-----------------------------------------------------------------------------------------------------------------------------------------------------------------------------------------------------------------------------------------------------------------------------------------------------------------------------------------------------------------------------------------------------------------------------------------------------------------------------------------------------------------------------------------------------------------------------------------------------------------------------------------------------------------------------------------------------------------------------------------------------------------------------------------------------------------------------------------------------------------------------------------------------------------------------------------------------------------------------------------------------------------------------------------------------------------------------------------------------------------------------------------------------------------------------------------------------------------------------------------------------------------------------------------------------------------------------------------------------------------------------------------------------------------------------------------------------------------------------------------------------------------------------------------------------------------------------------------------------------------------------------------------------------------------------------------------------------------------------------------------------------------------------------------------------------------------------------------------------------------------------------------------------------------------|
|                                                                                                                                    | AGTGGGAACGATGCCCTCATTGAGCATTTCATGGTTTGTGAAAACCGGA<br>CATGGCACTCCAGTCGCCTTCCCGTTCCGCTATCGGCTGAATTTGATTGCGA<br>GTGAGATATTTATGCCAGCCAGCCAGACGCAGACGCGCCGAGACAGAACT<br>TAATGGGCCCCGCTAACAGCGCGATTGCTGGTGACCCAATGCGACCAGAT<br>GCTCCACGCCCAGTCGCGTACCGTCTTCATGGGAGAAAATAATACTGTTGA<br>TGGGTGTCTGGTCAGAGACATCAAGAAATAACGCCGGAACATTAGTGACG<br>GCAGCTTCCACAGCAATGGCATCCTGGTCATCCAGCGGATAGTTAATGATC<br>AGCCCACTGACGCGTTGCGCGAGAAGATTGTGCACCGCCGCTTTACAGGCT<br>TCGACGCCGCTTCGTTCTACCATCGACACCACCACGCTGGCACCCAGTTGA<br>TCGGCGCGAGATTTAATCGCCGCGACAATTTGCGACGGCGCGTGCAGGGC<br>CAGACTGGAGGTGGCAACGCCAATCAGCAACGACTGTTTGCCCGCCAGTT<br>GTTGTGCCACGCGGTTGGGAATGTAATTCAGCTCCGCCATCGCCGCTTCCA<br>CTTTTCCCGCGTTTTTCGCAGAAACGTGGCTGGCCTGGTTACCCACGCGGGA<br>AACGGTCTGATAAGAGACACCGGCATACTCTGCGACATCGTATAACGTTAC<br>TGTTTTACATTACCCACCCTGAATTGACTCTCTTCCGGGCGCTATCATGCC<br>ATACCGCGAAAGGTTTTGCGCCATTGATGGTGTCCGGGATCTCGACGCTC<br>TCCCTTATGAAGTCTAACGCTGCTCTGGGCTAACTGTC                                                                                                                                                                                                                                                                                                                                                                                                                                                                                                                                                                                                                                                                                                                                                                                                                                                                                                                                                                      |
| Helper RNA (pT7–Helper2–<br>T7term–pT7–Helper1–T7term–<br>SpecR–(Bla Promoter)–CloDF13<br>origin–backbone– LacI–(Lac<br>promoter)) | TAATACGACTCACTATAGGGGACCGGTCTTTCAGAGACCGGTGCCGCC<br>GGTGGAGTGGCGGCCCTCGGCGCGGGGTACTGTTCCACGATGGTGTAGTC<br>CTACTTAGCATAACCCCTTGGGGCCTCTAAACGGGTCTTGAGGGGTTTTTG<br>CTGAAACCTCAGGCATTTGAGAAGCACACGGTCACACTGCTTCCGGTAGTC<br>AATAAAATAATACGACTCACTATAGGGCGTGAGATAAGCACATCTCACGTG<br>TACGCGCCGGGCAGTTGCACGGGCTTCTTAAGCTTGTAAGTGGTCTTGACCT<br>CAGCGACTTAGCATAACCCCTTGGGGCCTCTAAACGGGTCTTGAGGGGTTT<br>TTTGCCGGTAAACCAGCAATAGACATAAGCGGCTATTTAACGACCCTGCC<br>TGAACCGACGACCGGGTCATCGTGCCGGATCTTGCGGCCCTCGGCTTGA<br>ACGAATTGTTAGACATTATTTGCCGACTACCTGGTGATCTCGCCTTTCACG<br>TAGTGGACAAATTCTTCCAAGTATCTGCGCGCGAGGCCAAGCGATCTTCT<br>TCTGTCCAAGATAAGCCTGTCTAGCTTCAAGTATGACGGGCTGATACTGG<br>GCCGGCAGGCGCTCCATTGCCCAGTCGGCAGCGACATCCTTCGGCGCGATT<br>TTGCCGGTTACTGCGCTGTACCAAATGCGGGACAACGTAAGCACTACATTT<br>CGCTCATCGCCAGCCAGTCGGGCGGCGAGTTCCATAGCGTTAAGGTTTCA<br>TTAGCGCCTCAAATAGATCCTGTTCAGGAACCGGATCAAAGAGTTCCTCC<br>GCCGCTGGACCTACCAAGGCAACGCTATGTTCTCTTGCTTTTGTACGAAG<br>ATAGCCAGATCAATGTCGATCGTGGCTGGCTCGAAGATACCTGCAAGAAT<br>GTCATTGCGCTGCCATTCTCCAAATTGCAGTTCGCGCTTAGCTGGATAACGC<br>CACGAATGATGTCGTCGTGCACAACAATGGTGACTTCTACAGCGCGGAG<br>AATCTCGCTCTCTCCAGGGGAAGCCGAAGTTTCCAAAAGGTCGTTGATCAA<br>AGCTCGCCGCGTTGTTTCATCAAGCCTACGGTCACCGTAACCAGCAAATC<br>AATATCACTGTGTGGCTTCAGGCCGCCATCCACTGCGGAGCCGTACAAATG<br>TACGGCCAGCAACGTCGGTTCGAGATGGCGCTCGATGACGCCAACTACCTC<br>TGATAGTTGAGTCGATACTTCGGCGATACCGCTTCCTCATACTCTTCCTT<br>TTTCAATATTATTGAAGCATTATCAGGGTATTGTCTCATGACGGATACA<br>TATTTGAATGTATTTAGAAAAATAAACAAATAGCTAGCTCACTCGGTGCGT<br>ACGCTCCGGGCGTGAGACTGCGGCGGGCGCTGCGGACACATACAAAGTTA<br>CCACAGATTCCGTGGATAAGCAGGGGACTAACATGTGAGGCAAAACAGC<br>AGGGCCGCGCCGGTGGCGTTTTTCCATAGGCTCCGCCCTCCTGCCAGAGTT<br>CACATAAACAGACGCTTTTCCGGTGATCTGTGGGAGCCGTGAGGCTCAAC<br>CATGAATCTGACAGTACGGGCGAAACCCGACAGGACTTAAAGATCCCCAC<br>CGTTTCCGGCGGGTGCCTCCCTCTTGCGCTCTCCTGTTCCGACCCTGCCGTTT<br>ACCGGATACCTGTTCCGCCTTCTCCCTTACGGGAAGTGTGGCGCTTCTCA |

TAGCTCACACACTGGTATCTCGGCTCGGTGTAGGTCTGCTCCAAGCTG  
GGCTGTAAGCAAGAACTCCCCGTTTCAGCCCGACTGCTGCGCCTTATCCGGT  
AACTGTTCACTTGAGTCCAACCCGGAAAAGCACGGTAAAACGCCACTGGC  
AGCAGCCATTGGTAACTGGGAGTTTCGCAGAGGATTTGTTTAGCTAAACACG  
CGGTTGCTCTTGAAGTGTGCGCCAAAGTCCGGCTACACTGGAAGGACAGAT  
TTGGTTGCTGTGCTCTGCGAAAGCCAGTTACCACGGTTAAGCAGTTCCCCA  
ACTGACTTAACCTTCGATCAAACCACCTCCCCAGGTGGTTTTTTCGTTTACA  
GGGCAAAAGATTACGCGCAGAAAAAAGGATCTCAAGAAGATCCTTTGAT  
CTTTTCTACTGAACCGCTCTAGATTTTCAGTGCAATTTATCTCTTCAAATGTA  
GCACCTGAAGTCAGCCCCATACGATATAAGTTGTAATTCTCATGTTAGTCA  
TGCCCCGCGCCACCGGAAGGAGCTGACTGGGTGAAGGCTCTCAAGGGC  
ATCGGTCGAGATCCCGGTGCCTAATGAGTGAGCTAACTTACATTAATTGCG  
TTGCGCTCACTGCCCCGCTTTCAGTCGGGAAACCTGTCGTGCCAGCTGCATT  
AATGAATCGGCCAACGCGCGGGGAGAGGCGGTTTGCGTATTGGGCGCCAG  
GGTGGTTTTTCTTTTACCAGTGAGACGGGCAACAGCTGATTGCCCTTACC  
GCCTGGCCCTGAGAGAGTTGCAGCAAGCGGTCCACGCTGGTTTGGCCCAGC  
AGGCGAAAATCCTGTTTGATGGTGGTTAACGGCGGGATATAACATGAGCTG  
TCTTCGGTATCGTCGTATCCCACTACCGAGATGTCCGCACCAACGCGCAGC  
CCGGAATCGGTAATGGCGCGCATTGCGCCCAGCGCCATCTGATCGTTGGCA  
ACCAGCATCGCAGTGGGAACGATGCCCTCATTACGATTTGCATGTTTTGT  
TGAAAACCGGACATGGCACTCCAGTCGCCTTCCCGTTCCGCTATCGGCTGA  
ATTTGATTGCGAGTGAGATATTTATGCCAGCCAGCCAGACGCAGACGCGCC  
GAGACAGAACTTAATGGGCCCCGCTAACAGCGCGATTGCTGGTGACCCAA  
TGCGACCAGATGCTCCACGCCCAGTCGCGTACCGTCTTCATGGGAGAAAAAT  
AATACTGTTGATGGGTGTCTGGTCAGAGACATCAAGAAATAACGCCGGAA  
CATTAGTGCAGGCAGCTTCCACAGCAATGGCATCCTGGTCATCCAGCGGAT  
AGTTAATGATCAGCCCACTGACGCGTTGCGCGAGAAGATTGTGCACCGCC  
GCTTTACAGGCTTCGACGCGCTTCGTTTACCATCGACACCACCACGCTG  
GCACCCAGTTGATCGGCGCGAGATTTAATCGCCGCGACAATTTGCGACGGC  
GCGTGCAGGGCCAGACTGGAGGTGGCAACGCCAATCAGCAACGACTGTTT  
GCCCCGCCAGTTGTTGTGCCACGCGGTTGGGAATGTAATTCAGCTCCGCCAT  
CGCCGCTTCCACTTTTTCCCGCGTTTTTCGCAGAAACGTGGCTGGCCTGGTTC  
ACCACGCGGGAAACGGTCTGATAAGAGACACCGGCATACTCTGCGACATC  
GTATAACGTTACTGGTTTCACATTCACCACCCTGAATTGACTCTTCCGGG  
CGCTATCATGCCATACCGCGAAAGGTTTTGCGCCATTTCGATGGTGTCCGGG  
ATCTCGACGCTCTCCCTTATGAGTGATAGCCGTTTGTCTGGTGTCTACGCCG  
CGCGGGCTAACTGTC

**Supplementary Table S3.** *mCherry* mRNA sensor sequences used in this study. Common sequence element from high-performance first-generation toehold switch was colored in yellow [3]. Conserved linker sequence was indicated as gray. Trigger binding region was covered in green and its complementary region was colored in blue. Plasmid sequences of *mCherry* sensor can be constructed by replacing the sensor RNA region in the example plasmids in Table S2 with the *mCherry* sensor sequences described underneath.

| Name             | Target site | Sequence                                                                                                                    |
|------------------|-------------|-----------------------------------------------------------------------------------------------------------------------------|
| Sensor A         | 448:477     | AGGGGAAGTTGGTGCCGCGCAGCTTCACGTTATAGTTATGAGACAAGAACAGAGGA<br>GACATAACATGAACGTGAAGAACCACGTTAACCTGGCGGCAGCGCAAAAG              |
| Sensor C         | 662:697     | TGTGGGAGGTGATGTCCAACCTTGATGTTGACGTTGTGTTATAGTTATGAGACAAGAA<br>CAGAGGAGACATAACATGAACACAACGAACTGTGTTAACCTGGCGGCAGCGCAAA<br>AG |
| Sensor Variant 1 | 568:602     | TAGTGGCCGCCGTCCTTCAGCTTCAGCCTCTGCTTGTTATAGTTATGAGACAAGAAC<br>AGAGGAGACATAACATGAACAGCAGAACCTTGTTAACCTGGCGGCAGCGCAAAA<br>G    |
| Sensor Variant 2 | 463:498     | CTTCTGCATTACGGGGCCGTCGGAGGGGAAGTTGGTGTTATAGTTATGAGACAAGAA<br>CAGAGGAGACATAACATGAACACCAACAACGGTGTTAACCTGGCGGCAGCGCAAA<br>AG  |

**Supplementary Table S4.** Helper sequences for *mCherry* mRNA sensor used in this study. Plasmid sequences of *mCherry* helper can be constructed by replacing the Helper 1 and Helper 2 region in the example plasmids in Table S2 with the appropriate helper sequences described underneath. 5' structure was colored in green. mRNA binding regions were colored in yellow, and 3 nt bulge was colored in gray.

| Name             | Target site          | Position   | Sequence                                                                                        |
|------------------|----------------------|------------|-------------------------------------------------------------------------------------------------|
| Helper C         |                      |            |                                                                                                 |
| H1-60            | 599:628<br>+ 629:658 | Upstream   | CGTGAGATAAGCACATCTCACGCGCCGGGCAGTTGCACGGGC<br>TTCTTGGCCTACATGTAGGTGGTCTTGACCTCAGCGTCGTAGT       |
| H1-30            | 701:730<br>+ 731:760 | Upstream   | CGTGAGATAAGCACATCTCACGCGCCGGGCAGTTGCACGGGC<br>TTCTTGGCCT                                        |
| H1-15            | 629:658              | Upstream   | CGTGAGATAAGCACATCTCACGCGCCGGGCAGTTGCA                                                           |
| H2-60            | 701:730              | Downstream | ACCGGTCTTTGCAGAGACCGGTGCGCGCCGGTGAGTGGCGGC<br>CCTCGGCGCCGGGTTCGTACTGTTCCACGATGGTGTAGTCCT        |
| H2-30            | 644:658              | Downstream | ACCGGTCTTTGCAGAGACCGGTGTTCTGTAAGTGTTCACGATGGT<br>GTAGTCCT                                       |
| H2-15            | 701:715              | Downstream | ACCGGTCTTTGCAGAGACCGGTGATGGTGTAGTCCT                                                            |
| Helper variant 1 |                      |            |                                                                                                 |
| H1-60            | 505:534<br>+ 535:564 | Upstream   | GTCCACCAAAACAGGTGGGACACACTCGCCCTTCAGCGCGC<br>CGTCCTCGGGGTAGGGCATCCGCTCGGAGGAGGCCTCCAGCC<br>CAT  |
| H2-60            | 606:635<br>+ 636:665 | Downstream | GACCGTCCGGGCTAGGACGGTCATTTTGTACGCGCCGGGCAGT<br>TGCACGGGCTTCGGGTGGCCTTGTAGGTGGTCTTGACCTCAGC<br>G |
| H2-30            | 606:635              | Downstream | GACCGTCCGGGCTAGGACGGTCATTTTGGCCTTGTAGGTGGTC<br>TTGACCTCAGCG                                     |
| H2-15            | 606:620              | Downstream | GACCGTCCGGGCTAGGACGGTCATTTCTTGACCTCAGCG                                                         |



**Supplementary Table S5.** *clb* mRNA sequences used in this study. Plasmid sequences of *clb* mRNA can be constructed by replacing Table S2. with the *clb* mRNA sequences described underneath.

| Name        | Sequence                                                                                                                                                                                                                                                                                                                                                                                                                                                                                                                                                                                                                                                                                                                                                                                                                                                                                                                                                                                                                                                                                                                                                                                                                                                                                                                                                                                                                                                                                                                                                                                                                                                              |
|-------------|-----------------------------------------------------------------------------------------------------------------------------------------------------------------------------------------------------------------------------------------------------------------------------------------------------------------------------------------------------------------------------------------------------------------------------------------------------------------------------------------------------------------------------------------------------------------------------------------------------------------------------------------------------------------------------------------------------------------------------------------------------------------------------------------------------------------------------------------------------------------------------------------------------------------------------------------------------------------------------------------------------------------------------------------------------------------------------------------------------------------------------------------------------------------------------------------------------------------------------------------------------------------------------------------------------------------------------------------------------------------------------------------------------------------------------------------------------------------------------------------------------------------------------------------------------------------------------------------------------------------------------------------------------------------------|
| <i>clbA</i> | ATGAGGATTGATATATTAATTGGACATACTAGTTTTTTCATCAAACCAGTAGAGATAAAGTTCCTT<br>CACTATCTCAATGAGGAAGAAATAAAAACGCTATGATCAGTTTCATTTTGTGAGTGATAAAGAAGT<br>CTATATTTTAAGCCGTATCCTGCTCAAAACAGCACTAAAAAGATATCAACCTGATGTCTCATTAC<br>AATCATGGCAATTTAGTACGTGCAAATATGGCAAACCATTTATAGTTTTTCCTCAGTTGGCAAAA<br>AAGATTTTTTTTAAACCTTTCCCATACTATAGATACAGTAGCCGTTGCTATTAGTTCTCACTGCGAG<br>CTTGGTGTGATATTGAACAAATAAGAGATTTAGACAACCTCTTATCTGAATATCAGTCAGCATTTT<br>TTTACTCCACAGGAAGCTACTAACATAGTTTCACTTCCTCGTTATGAAGGTCAATTACTTTTTTGG<br>AAAATGTGGACGCTCAAAGAAGCTTACATCAAATATCGAGGTAAAGGCCTATCTTTAGGACTG<br>GATTGTATTGAATTTCAATTAACAAATAAAAACTAACTTCAAATATAGAGGTTACCTGTTTAT<br>TTCTCTCAATGGAAAATATGTAATCATTTCTCGCATTAGCCTCTCCACTCATCACCCCTAAAATA<br>ACTATTGAGCTATTTCTATGCAGTCCCAACTTTATCACCACGACTATCAGCTAATTCATTCGTCA<br>AATGGGCAGAATTGA                                                                                                                                                                                                                                                                                                                                                                                                                                                                                                                                                                                                                                                                                                                                                                                                                                                              |
| <i>clbE</i> | ATGAAAAAGCAAGATATGAAAGCCGCCATTTCGGAATTTCTTTCACGCTCATTACGTGGGCATAC<br>GTTGAACGATGATGACGATATTTTTTCTCTCGGGCTTGTCATTTCGTTATTTACTGTGCAAATCATA<br>CTGTTTATAGAAAAAATTTTTCAGGTTGAGCTGGAAGTGAGTGAGTTGAAAACAGAACAGATTG<br>CTACCGTCAATAAAATAGTGGAGCTCATTACGCGACAAACAGGCCTGGAGTAA                                                                                                                                                                                                                                                                                                                                                                                                                                                                                                                                                                                                                                                                                                                                                                                                                                                                                                                                                                                                                                                                                                                                                                                                                                                                                                                                                                                                 |
| <i>clbP</i> | ATGACAATAATGGAACACGTTAGCATTAAAACATTATATCATCTCCTGTGCTGTATGCTGCTCTTT<br>ATTTCCGCTATGTGCGCTTTGGCGCAAGAACATGAGCCTATCGGGGCGCAAGATGAGCGCCTGTC<br>GACATTAATTCACCAACGGATGCAGGAGGCCAAGGTCCCAGCCCTTTCCGTAAGTGTGACCATT<br>AAGGGGGTACGTCAGCGATTTGTCTACGGTGTGCGGATGTGGCTAGTCAGAAAGCGAATACTCT<br>AGACACAGTTTACGAGCTGGGATCGATGAGTAAGGCGTTTACCGGACTTGTGGTGCAAATACTG<br>ATTCAGGAAGGCAGACTCCGGCAAGGGGATGATATCATTACCTATCTGCCGGAATGCGCTTGA<br>ATTATCAGGGAAAACCTGCTTCCCTGACCGTGGCTGATTTCCTTTATCATACATCAGGATTGCCTT<br>TTTCAACACTGGCTCGGCTGGAAAACCCCTATGCCTGGGAGCGCTGTGGCACAGCAACTGCGCAA<br>CGAGAATCTGCTGTTTGCGCCGGGTGCGAAGTTTAGCTATGCCTCCGCCAATTATGATGTGTTGGG<br>CGCGGTGATTGAAAATGTGACGGGAAAAACCTTTACAGAGGTCATTGCGGAACGACTCACGCAG<br>CCGCTGGGCATGTCGGCGACTGTGGCAGTTAAGGGGGATGAGATTATTGTCAACAAGGCAAGCG<br>GCTATAAACTGGGATTTCGGCAAACCCGTTCTGTTTCATGCGCCTCTGGCCCGGAACCATGTTCTCTG<br>CCGCCTATATCCATAGCACTCTGCCTGATATGGAAATATGGATAGACGCCTGGTTGCACAGAAAG<br>GCTTTGCCGGCAACGCTGCGTGAGGCGATGAGTAACAGTTGGCGTGTAATAGTGATGTTCCGCT<br>TGCCGCAGACAATCGTATCCTCTATGCCAGCGGTTGGTTTATCGACCAGAATCAAGGCCCTTACA<br>TCAGTCACGGTGGGCAGAATCCAACTTTTCTTCTTGCAATTGCGTTGCGACCGGATCAGCAGATT<br>GGCATTGTTGCGCTGGCAAATATGAATTCGAATCTGATACTACAGCTTTGCGCGGATATCGATAA<br>TTATCTGCGCATTGGCAAATATGCTGACGGCGCTGGTGATGCAATTACAGCCACCGATAACCTTT<br>TCGTCTACCTCACGTTGTTGCTGTGTTTTTGGGGGGCGGTGGTTGTAGTGCGCGGTGCTTTCCGTGT<br>TTATCGCGCAACGGCGCATGGCCCTGGAAAACAGCAGAGGTTACGTTTACGCGTACGTGACTAT<br>ATCATCGCCTTGGCGGTTTCTGGGCTCGTGGCCGCCATGCTCTATGTCGACCGGGTATACTATCT<br>CCAGGACTTGACTGGCGTTTTATCTTGGTATGGGGTCCATCGAGCGTGTGGCGATACCGTTTCGGA<br>ATTATCCTGTAGCTTTTCGTTCTGACATTAAATCATCAAATTAACGAATTCTATTACACAACAAG<br>GAGTGGGACGATGAGTAA |
| <i>clbQ</i> | ATGAGTAATATCAGTTTGTATTGTTTGCCATATTCAGGTGGTTCTGCCGCCATGTATTATAAATGG<br>CGTAGCGTGCTGTGCGACAATATTACTTTGCGGCCTTTAGAACCTGCGGGGAGGGGAAGTAGAAT<br>ACGCCAGCCGCTGTGTCTTACGATGGTGGATGCCGTCGCTGACCTTTATCAACAATTTGTGAAAC<br>ACTACACAGGTGGAGACTACGCCATTTTTGGGCATAGTCTCGGAGGGATCATGGCCTTCGAAGT<br>GTGCATTATATTCTCGATCATGGACATGACATGCCATGCGCGCTGTTTTTTTCCGGCTGTGCCCCA<br>CCCGATCGGGCCTCTCATGAAGTAATACTGCATACCTTGCCCGATCAGGCGTTTATGGAAGAGAT<br>CGTCAAGCTGGGCGGAACCTCCGGTTGATGTCTTTCGTAATAAAGAGTTAATGACAATTTTCACCC                                                                                                                                                                                                                                                                                                                                                                                                                                                                                                                                                                                                                                                                                                                                                                                                                                                                                                                                                                                                                                                                                                                                                                     |

CCATCATTA AAAACGATTATCGGCTCTATGAGCAGTATGTATTT CAGGCCAAGGCGCGCACATTA  
 ACCTGTCCGATCGTGCTATTT CATGGCGATGCTGACAATCTGGTAATGCAGGATGAATTACTTGC  
 ATGGGAAAAATT CACCACACGAAAGACGCGGACTATTATATTTCTGCTGCCGATCATTTTTTTGT  
 CGATAAGCATTTTGAACAGGTGGTAGGTTATGTGAACCAGACGATTGAATCACTCGAAATAGTA  
 GGGTAG

**Supplementary Table S6.** *clb* synthetic short trigger sequences used in this study.

| Name        | Target site | Classification | Sequence                        |
|-------------|-------------|----------------|---------------------------------|
| <i>clbA</i> | 390:419     | open           | TTTTTTTACTCCACAGGAAGCTACTAACAT  |
|             | 477:506     | open           | AGAAGCTTACATCAAATATCGAGGTAAAGG  |
|             | 447:476     | structured     | ATTACTTTTTTGGAAAATGTGGACGCTCAA  |
|             | 513:542     | structured     | TTTAGGACTGGATTGTATTGAATTTCAATTT |
|             | 630:659     | intermediate   | CTCTCCACTCATCACCCCTAAAATAACTAT  |
| <i>clbE</i> | 1:30        | open           | ATGAAAAAGCAAGATATGAAAGCCGCCATT  |
|             | 219:248     | open           | GCTCATTCAGCGACAAACAGGCCTGGAGTA  |
|             | 95:124      | structured     | TCCGGCTTGTCCATTTCGTTATTTACTGTGC |
|             | 40:69       | structured     | CTTTCACGCTCATTACGTGGGCATACGTTG  |
|             | 83:112      | intermediate   | ATATTTTTTCTCTCGGGCTTGTCCATTTCGT |
| <i>clbP</i> | 969:998     | open           | TTACATCAGTCACGGTGGGCAGAATCCAAA  |
|             | 992:1021    | open           | ATCCAAACTTTTCTTCTGTCATTGCGTTGC  |
|             | 1205:1234   | structured     | CGGTGTTGTAGTGC GCGGTGCTTTCCGTG  |
|             | 846:875     | structured     | TTTGCCGGCAACGCTGCGTGAGGCGATGAG  |
|             | 160:189     | intermediate   | GCCAAGGTCCCAGCCCTTTCCGTAAGTGTG  |
| <i>clbQ</i> | 256:285     | open           | GAAGTGGTGCATTATATTCTCGATCATGGA  |
|             | 506:535     | open           | CCAAGGCGCGCACATTAACCTGTCCGATCG  |
|             | 133:162     | structured     | CGCCAGCCGCTGTGTCTTACGATGGTGGAT  |
|             | 475:504     | structured     | TATCGGCTCTATGAGCAGTATGTATTT CAG |
|             | 86:115      | intermediate   | ATATTACTTTGCGGCCTTTAGAACCTGCGG  |

**Supplementary Table S7.** *clb* mRNA sensor sequences used in this study. Common sequence element from high-performance first-generation toehold switch was colored in yellow [3]. Conserved linker sequence was colored as gray. Trigger binding region was covered in green and its complementary region was colored in cyan. Plasmid sequences of *clb* sensor can be constructed by replacing the sensor RNA region in the example plasmids in Table S2 with the *clb* sensor sequences described underneath.

| Name        | Target site | Classification | Sequence                                                                                                                |
|-------------|-------------|----------------|-------------------------------------------------------------------------------------------------------------------------|
| <i>clbA</i> | 390:419     | open           | ATGTTAGTAGCTTCCTGTGGAGTAAAAAAAGTTATAGTTATGAGACAA<br>GAACAGAGGAGACATAACATGAAC TTTTTTAAACAAAGTTAACCTGGC<br>GGCAGCGCAAAAAG |
|             | 477:506     | open           | CCTTTACCTCGATATTTGATGTAAGCTTCTGTTATAGTTATGAGACAAG<br>AACAGAGGAGACATAACATGAACAGAAGCAACTCTGTAACTGGCG<br>GCAGCGCAAAAAG     |
|             | 447:476     | structured     | TTGAGCGTCCACATTTTCCAAAAAAGTAATGTTATAGTTATGAGACAA<br>GAACAGAGGAGACATAACATGAACATTACTAACAATGTAACTGGC<br>GGCAGCGCAAAAAG     |
|             | 513:542     | structured     | AAATGAAATTCAATACAATCCAGTCCTAAAGTTATAGTTATGAGACA<br>AGAACAGAGGAGACATAACATGAAC TTTAGGAACAAAGTTAACCTG<br>GCGGCAGCGCAAAAAG  |

|             |           |              |                                                                                                                      |
|-------------|-----------|--------------|----------------------------------------------------------------------------------------------------------------------|
|             | 630:659   | intermediate | ATAGTTATTTTAGGGGTGATGAGTGGAGAGGTTATAGTTATGAGACAA<br>GAACAGAGGAGACATAACATGAACCTCTCCAACGAGGTTAACCTGGC<br>GGCAGCGCAAAAG |
| <i>clbE</i> | 1:30      | open         | AATGGCGGCTTTCATATCTTGCTTTTTCATGTTATAGTTATGAGACAAG<br>AACAGAGGAGACATAACATGAACATGAAAACCATGTTAACCTGGC<br>GGCAGCGCAAAAG  |
|             | 219:248   | open         | TACTCCAGGCCTGTTTGTCGCTGAATGAGCGTTATAGTTATGAGACAA<br>GAACAGAGGAGACATAACATGAACGCTCATAACAGCGTTAACCTGGC<br>GGCAGCGCAAAAG |
|             | 95:124    | structured   | GCACAGTAAATAACGAATGGACAAGCCCGAGTTATAGTTATGAGACA<br>AGAACAGAGGAGACATAACATGAACTCGGGCAACCGAGTTAACCTG<br>GCGGCAGCGCAAAAG |
|             | 40:69     | structured   | CAACGTATGCCCACGTAATGAGCGTGAAAGGTTATAGTTATGAGACA<br>AGAACAGAGGAGACATAACATGAACCTTTCAACAAGGTTAACCTGG<br>CGGCAGCGCAAAAG  |
|             | 83:112    | intermediate | ACGAATGGACAAGCCCGAGAGAAAAAATATGTTATAGTTATGAGACA<br>AGAACAGAGGAGACATAACATGAACATATTTAACTATGTTAACCTGG<br>CGGCAGCGCAAAAG |
| <i>clbP</i> | 969:998   | open         | TTTGGATTCTGCCCACCGTGACTGATGTAAGTTATAGTTATGAGACAA<br>GAACAGAGGAGACATAACATGAACCTTACATAACCTGGCGGCAGCGC<br>AAAAG         |
|             | 992:1021  | open         | GCAACGCAATGCAAGAAGAAAAGTTTGGATGTTATAGTTATGAGACA<br>AGAACAGAGGAGACATAACATGAACATCCAAACGATGTTAACCTG<br>GCGGCAGCGCAAAAG  |
|             | 1205:1234 | structured   | CACGGAAAGCACCGCGCACTACAACCACCGTTATAGTTATGAGACA<br>AGAACAGAGGAGACATAACATGAACCGGTGGAACCCGGTTAACCTG<br>GCGGCAGCGCAAAAG  |
|             | 846:875   | structured   | CTCATCGCCTCACGCAGCGTTGCCGGCAAAGTTATAGTTATGAGACAA<br>GAACAGAGGAGACATAACATGAACCTTGCCAACAAAGTTAACCTGGC<br>GGCAGCGCAAAAG |
|             | 160:189   | intermediate | CACACTTACGGAAAGGGCTGGGACCTTGGCGTTATAGTTATGAGACA<br>AGAACAGAGGAGACATAACATGAACGCCAAGAACGGCGTTAACCTG<br>GCGGCAGCGCAAAAG |
| <i>clbQ</i> | 256:285   | open         | TCCATGATCGAGAATATAATGCACCAGTTCGTTATAGTTATGAGACAA<br>GAACAGAGGAGACATAACATGAACGAACTGAACTTCGTTAACCTGGC<br>GGCAGCGCAAAAG |
|             | 506:535   | open         | CGATCGGACAGGTTAATGTGCGCGCCTTGGGTTATAGTTATGAGACAA<br>GAACAGAGGAGACATAACATGAACCCAAGGAAGTGGGTTAACCTGG<br>CGGCAGCGCAAAAG |
|             | 133:162   | structured   | ATCCACCATCGTAAGACACAGCGGCTGGCGGTTATAGTTATGAGACA<br>AGAACAGAGGAGACATAACATGAACCGCCAGAACGCGGTTAACCTG<br>GCGGCAGCGCAAAAG |
|             | 475:504   | structured   | ATCCACCATCGTAAGACACAGCGGCTGGCGGTTATAGTTATGAGACA<br>AGAACAGAGGAGACATAACATGAACCGCCAGAACGCGGTTAACCTG<br>GCGGCAGCGCAAAAG |
|             | 86:115    | intermediate | CCGCAGGTTCTAAAGGCCGCAAAGTAATATGTTATAGTTATGAGACA<br>AGAACAGAGGAGACATAACATGAACATATTAACCTATGTTAACCTGG<br>CGGCAGCGCAAAAG |

**Supplementary Table S8.** Helper sequences for *clb* mRNA sensor used in this study. Plasmid sequences of *clb* helper can be constructed by replacing the Helper 1 and Helper 2 region in the example plasmids in Table S2 with the appropriate helper sequences described underneath. 5' structure was colored in green. mRNA binding regions were covered in yellow.

| Name         | Target site | Position   | Sequence                                                       |
|--------------|-------------|------------|----------------------------------------------------------------|
| Open         |             |            |                                                                |
| <i>clbA1</i> | 357:386     | upstream   | GCTCCAGCCCGCTCGCTGGAGCACCTGACTGATATTCAGATAA<br>GAGTTGTCTAAAACC |
|              | 423:452     | downstream | GGCTGCTCGGGGAGGAGCAGCCGAAAGTAATTGACCTTCATA<br>ACGAGGAAGTGAAACC |
| <i>clbA2</i> | 444:473     | upstream   | GCACCGCCAAGTACGGCGGTGCCCCAGCGTCCACATTTTCCAA<br>AAAAGTAATTGAATT |
|              | 510:539     | downstream | GCCCCTACAAGTCCGTAGGGGCTCTGAAATTCAATACAATCC<br>AGTCCTAAAGATCCC  |
| <i>clbP1</i> | 936:965     | upstream   | GGTCGAGGAAAACGCCTCGACCGTACCTTGATTCTGGTCGATA<br>AACCAACCGCTGCGC |
|              | 1002:1031   | downstream | GCCCCGCACATCAGCGGGGGCAAATGATCCGGTCGCAACGC<br>AATGCAAGAAGAAAAG  |
| <i>clbP2</i> | 959:988     | upstream   | GGAGCTGCAACGGAGCAGCTCCACCGCCCACCGTGACTGATG<br>TAAGGGCCTTGATCTA |
|              | 1025:1054   | downstream | GCCGCGTCGACTAAGACGCGGCACGCCAGCGCAACAATGCCA<br>ATCTGCTGATCCGACA |
| <i>clbQ1</i> | 223:252     | upstream   | GCGGTCGCTCCGCCGCGACCGCAACGGCCATGATCCCTCCGAG<br>ACTATGCCCAAAGTC |
|              | 289:318     | downstream | CGCCTCGCAAAAAGCGAGGCGTAAGCCGGAAAAAACAGC<br>GCGCATGGCATGTTCGAT  |
| <i>clbQ2</i> | 473:502     | upstream   | GGACCCTCTTTGCTGAGGGTCCACCGAAATACATACTGCTCAT<br>AGAGCCGATAATACC |
|              | 539:568     | downstream | GCCCAAGCCCACCCGCTTGGGCATATTACCAGATTGTCAGCAT<br>CGCCATGAAATACCC |
| Intermediate |             |            |                                                                |
| <i>clbA</i>  | 597:626     | upstream   | GGACGTACCATTCAGTACGTCCTTAAATGCGAGAAATGAGTTA<br>CATATTTTCCATCGG |
|              | 663:692     | downstream | GACGGTCCGGCGGAGGACCGTCACATGATAAAGTTGGGACTG<br>CATAGGAAATAGCGAA |
| <i>clbE</i>  | 127:156     | upstream   | GGGCGGCCTAACCCGGCCGCCCTTTCATCATCGTTCAACGTAT<br>GCCACGTAATGGCT  |
|              | 193:222     | downstream | GCGCCCTGGCGCGACAGGGCGCACCTTCTATAAACAGTATGA<br>TTTGACAGTAAACC   |
| <i>clbP</i>  | 50:79       | upstream   | GGGTGAGGGCGAAACCTCACCCAACCTGCATCCGTTGGTGAAT<br>TAATGTCGACAGTCC |
|              | 116:145     | downstream | CAGTAGGCGACCCAGCCTACTGAGCGTAGACAAATCGCTGAC<br>GTACCCCTTAATTAA  |
| <i>clbQ</i>  | 53:82       | upstream   | GGCGGCGCGATGGAGCGCCGCCAAACCGACAGCAGCTACGC<br>CATTATAATACACAC   |
|              | 119:148     | downstream | GCCGGAGCATATCCGCTCCGGCTTCGACACAGCGGCTGGCGTA<br>TTCTAGTTCCCCCA  |

**Supplementary Table S9.** Other accessory sequences used in this study. Accessory sequences used for constructing plasmids are indicated here.

| Name                | Sequence                                                                                                                                                                                                                                                                                                                                                                                                                                                                                                                                                                                                                                                                                                                                                                                                                                                                         |
|---------------------|----------------------------------------------------------------------------------------------------------------------------------------------------------------------------------------------------------------------------------------------------------------------------------------------------------------------------------------------------------------------------------------------------------------------------------------------------------------------------------------------------------------------------------------------------------------------------------------------------------------------------------------------------------------------------------------------------------------------------------------------------------------------------------------------------------------------------------------------------------------------------------|
| RBS                 | AGAAGGAGA or AGAGGAGA                                                                                                                                                                                                                                                                                                                                                                                                                                                                                                                                                                                                                                                                                                                                                                                                                                                            |
| Linker              | AACCTGGCGGCAGCGCAAAAG                                                                                                                                                                                                                                                                                                                                                                                                                                                                                                                                                                                                                                                                                                                                                                                                                                                            |
| T7term              | TAGCATAACCCCTTGGGGCCTCTAAACGGGTCTTGAGGGGTTT<br>TTTG                                                                                                                                                                                                                                                                                                                                                                                                                                                                                                                                                                                                                                                                                                                                                                                                                              |
| <i>GFPmut3b_ASV</i> | ATGCGTAAAGGAGAAGAAGCTTTTCACTGGAGTTGTCCCAATTC<br>TTGTTGAATTAGATGGTGATGTTAATGGGCACAAATTTTCTGTC<br>AGTGGAGAGGGTGAAGGTGATGCAACATACGGAAAACCTTACC<br>CTTAAATTTATTTGCACTACTGGAAAACCTACCTGTTCCGTGGCC<br>AACACTTGTCACTACTTTTCGGTTATGGTGTTCATGCTTTGCGA<br>GATACCCAGATCACATGAAACAGCATGACTTTTTCAAGAGTGC<br>CATGCCCCGAAGGTTACGTACAGGAAAGAACTATATTTTCAAA<br>GATGACGGGAACTACAAGACACGTGCTGAAGTCAAGTTTGAA<br>GGTGATACCCTTGTTAATAGAATCGAGTTAAAAGGTATTGATT<br>TTAAAGAAGATGGAAACATTCTTGGACACAAATTGGAATACA<br>ACTATAACTCACACAATGTATACATCATGGCAGACAAACAAA<br>AGAATGGAATCAAAGTTAACTTCAAAATTAGACACAACATTG<br>AAGATGGAAGCGTTCAACTAGCAGACCATTATCAACAAAATA<br>CTCCGATTGGCGATGGCCCTGTCCTTTTACCAGACAACCATTAC<br>CTGTCCACACAATCTGCCCTTTTCGAAAGATCCCAACGAAAAGA<br>GAGACCACATGGTCCTTCTTGAGTTTGTAACCGCTGCTGGGATT<br>ACACATGGCATGGATGAACTATACAAAAGGCCTGCAGCAAAC<br>GACGAAAACCTACGCTGCATCAGTTTAATAA                 |
| <i>mCherry</i>      | ATGGGCAGCAGCCATCATCATCATCACAGCAGCGGCCTG<br>GTGCCGCGCGGCAGCCataTgCGtaAAATGGTGAGCAAGGGCGA<br>AGAAGATAACATGGCCATCATCAAGGAGTTCATGCGCTTCAA<br>GGTTCACATGGAGGGCTCCGTGAACGGCCACGAGTTCGAGAT<br>CGAGGGCGAGGGCGAGGGCCGCCCTACGAGGGCACCCAGA<br>CCGCCAAGCTGAAGGTGACCAAGGGTGGCCCCCTGCCCTTCGC<br>CTGGGACATCCTGTCCCCTCAGTTCATGTACGGCTCCAAGGCC<br>TACGTGAAGCACCCCGCCGACATCCCCGACTACTTGAAGCTGT<br>CCTTCCCCGAGGGCTTCAAGTGGGAGCGCGTGATGAACTTCGA<br>GGACGGCGGCGTGGTGACCGTGACCCAGGACTCCTCCCTGCA<br>AGACGGCGAGTTCATCTACAAGGTGAAGCTGCGCGGCACCAA<br>CTTCCCCTCCGACGGCCCCGTAATGCAGAAGAAGACTATGGGC<br>TGGGAGGCCTCCTCCGAGCGGATGTACCCCGAGGACGGCGCG<br>CTGAAGGGCGAGATCAAGCAGAGGCTGAAGCTGAAGGACGG<br>CGGCCACTACGACGCTGAGGTCAAGACCACCTACAAGGCCAA<br>GAAGCCCGTGCAACTGCCCCGGCGGTACAACGTCAACATCAA<br>GTTGGACATCACCTCCCACAACGAGGACTACACCATCGTGGA<br>ACAGTACGAACGCGCCGAGGGCCGCCACTCCACCGGCGGCAT<br>GGACGAGCTGTACAAGTAA |

**Supplementary Table S10.** Primers used for qPCR.

| Primer Name        | Sequence (5' to 3')       |
|--------------------|---------------------------|
| <i>clbA_fwd</i>    | ATTAGTTCTCACTGCGAGC       |
| <i>clbA_rev</i>    | TCTTTGAGCGTCCACATTT       |
| <i>clbP_fwd</i>    | GAGTGCTATGGATATAGGCG      |
| <i>clbP_rev</i>    | CCAATTATGATGTGTTGGGC      |
| <i>clbE_fwd</i>    | GTTTTCAACTCACTCACTTCC     |
| <i>clbE_rev</i>    | ATTTCTTTCACGCTCATTACG     |
| <i>clbQ_fwd</i>    | GGTGAATTTTTCCCATGCAA      |
| <i>clbQ_rev</i>    | AGGCGTTTATGGAAGAGATC      |
| <i>mCherry_fwd</i> | GAAGATAACATGGCCATCATCAAGG |
| <i>mCherry_rev</i> | TACATGAACTGAGGGGACAGGAT   |
| 16S_rRNA_fwd       | TGGTAGTCCACGCCGTAAAC      |
| 16S_rRNA_rev       | TTTAACCTTGCGGCCGTACT      |
| <i>cysG_fwd</i>    | ATGCGGTGAACTGTGGAATAAACG  |
| <i>cysG_rev</i>    | CTCTTGCCATCGGATGTGCCCA    |

**Supplementary Table S11.** Gibbs free energy of mRNAs, mRNA sensors, and RNA complexes studied in this paper (unit: kcal/mol). For this calculation, full length mRNAs were used. ※  $\Delta\Delta\Delta G = \Delta\Delta G_{\text{helper}} - \Delta\Delta G_{\text{original}}$ .

| 1) [mRNA] + [toehold sensor] → [mRNA + toehold sensor].                    |                         |           |           |                |                |                |                |                |                |
|----------------------------------------------------------------------------|-------------------------|-----------|-----------|----------------|----------------|----------------|----------------|----------------|----------------|
| (kcal/mol)                                                                 | <i>mCherry</i> sensor C |           |           | A_open1        | A_open2        | P_open1        | P_open2        | Q_open1        | Q_open2        |
| $\Delta G[\text{mRNA}]$                                                    | -290.431                |           |           | -131.42        | -131.42        | -489.438       | -489.438       | -202.712       | -202.712       |
| $\Delta G[\text{toehold sensor}]$                                          | -28.137                 |           |           | -19.704        | -26.481        | -24.346        | -24.507        | -22.88         | -37.196        |
| $\Delta G[\text{mRNA} + \text{toehold sensor}]$                            | -371.688                |           |           | -187.65        | -192.459       | -551.231       | -546.148       | -267.209       | -275.103       |
| $\Delta\Delta G_{\text{original}}$                                         | <b>-53.12</b>           |           |           | <b>-36.526</b> | <b>-34.558</b> | <b>-37.447</b> | <b>-32.203</b> | <b>-41.617</b> | <b>-35.195</b> |
| 2) [mRNA + h1 + h2] + [toehold sensor] → [mRNA + h1 + h2 + toehold sensor] |                         |           |           |                |                |                |                |                |                |
| (kcal/mol)                                                                 | <i>mCherry</i> sensor C |           |           | A_open1        | A_open2        | P_open1        | P_open2        | Q_open1        | Q_open2        |
|                                                                            | Helper_60               | Helper_30 | Helper_15 |                |                |                |                |                |                |
| $\Delta G[\text{mRNA} + \text{h1} + \text{h2}]$                            | -542.652                | -428.143  | -367.885  | -256.599       | -249.457       | -630.618       | -636.051       | -342.383       | -331.403       |
| $\Delta G[\text{toehold sensor}]$                                          |                         | -28.137   |           | -19.704        | -26.481        | -24.346        | -24.507        | -22.88         | -37.196        |
| $\Delta G[\text{mRNA} + \text{h1} + \text{h2} + \text{toehold sensor}]$    | -627.23                 | -512.721  | -452.463  | -319.381       | -313.799       | -699.381       | -700.853       | -411.982       | -409.83        |
| $\Delta\Delta G_{\text{helper}}$                                           | <b>-56.441</b>          |           |           | <b>-43.078</b> | <b>-37.861</b> | <b>-44.417</b> | <b>-40.295</b> | <b>-46.719</b> | <b>-41.231</b> |
| $\Delta\Delta\Delta G$                                                     | <b>-3.321</b>           |           |           | <b>-6.552</b>  | <b>-3.303</b>  | <b>-6.97</b>   | <b>-8.092</b>  | <b>-5.102</b>  | <b>-6.036</b>  |

**Supplementary Table S12.** Performance information for a selection of toehold switches, toehold repressors, 3WJ repressors, and *clb* sensors.

| Name                                        | Type          | Fold change  |
|---------------------------------------------|---------------|--------------|
| Toehold switch                              |               |              |
| First-generation Toehold switch #1          | Short trigger | 292.0 ± 19.5 |
| First-generation Toehold switch #2          | Short trigger | 279.6 ± 17.6 |
| First-generation Toehold switch #3          | Short trigger | 265.3 ± 28.2 |
| Second-generation Toehold switch #1         | Short trigger | 665 ± 135    |
| Second-generation Toehold switch #2         | Short trigger | 586 ± 92     |
| Second-generation Toehold switch #3         | Short trigger | 557 ± 68     |
| mRNA sensor derived from toehold switch     |               |              |
| <i>mCherry</i> mRNA sensor #1               | Long trigger  | 57 ± 8       |
| <i>mCherry</i> mRNA sensor #2               | Long trigger  | 38 ± 2       |
| <i>mCherry</i> mRNA sensor #3               | Long trigger  | 17 ± 1       |
| <i>cat</i> mRNA sensor                      | Long trigger  | 7 ± 3        |
| <i>aadA</i> mRNA sensor                     | Long trigger  | 6 ± 1        |
| Toehold repressor                           |               |              |
| Toehold repressor #1                        | Short trigger | 172.8 ± 29.4 |
| Toehold repressor #2                        | Short trigger | 93.3 ± 26.6  |
| Toehold repressor #3                        | Short trigger | 88.5 ± 17.4  |
| mRNA sensor derived from toehold repressor  |               |              |
| <i>kanR</i> mRNA sensor                     | Long trigger  | 14 ± 2       |
| <i>bla</i> mRNA sensor                      | Long trigger  | 6 ± 3        |
| 3WJ repressor                               |               |              |
| 3WJ repressor #1                            | Short trigger | 134.2 ± 8.1  |
| 3WJ repressor #2                            | Short trigger | 85.2 ± 4.9   |
| 3WJ repressor #3                            | Short trigger | 66.1 ± 3.2   |
| mRNA sensor derived from 3WJ repressor      |               |              |
| <i>kanR</i> mRNA sensor                     | Long trigger  | 20 ± 4       |
| <i>aadA</i> mRNA sensor                     | Long trigger  | 7 ± 1        |
| Switch used in this paper                   |               |              |
| <i>clbP</i> sensor open #1                  | Short trigger | 942.5 ± 99.9 |
| <i>clbP</i> sensor open #2                  | Short trigger | 75.9 ± 11.2  |
| <i>clbQ</i> sensor open #1                  | Short trigger | 259.2 ± 22.3 |
| Switch with full length mRNA without helper |               |              |
| <i>clbP</i> sensor open #1 without helper   | Long trigger  | 35.8 ± 9.8   |
| <i>clbP</i> sensor open # without helper    | Long trigger  | 4.7 ± 0.8    |
| <i>clbQ</i> sensor open #1 without helper   | Long trigger  | 11.3 ± 1.1   |
| Switch with full length mRNA with helper    |               |              |
| <i>clbP</i> sensor open #1 with helper      | Long trigger  | 62.3 ± 16.8  |
| <i>clbP</i> sensor open #2 with helper      | Long trigger  | 57.0 ± 9.2   |
| <i>clbQ</i> sensor open #1 with helper      | Long trigger  | 15.8 ± 1.5   |

## Supplementary Figures

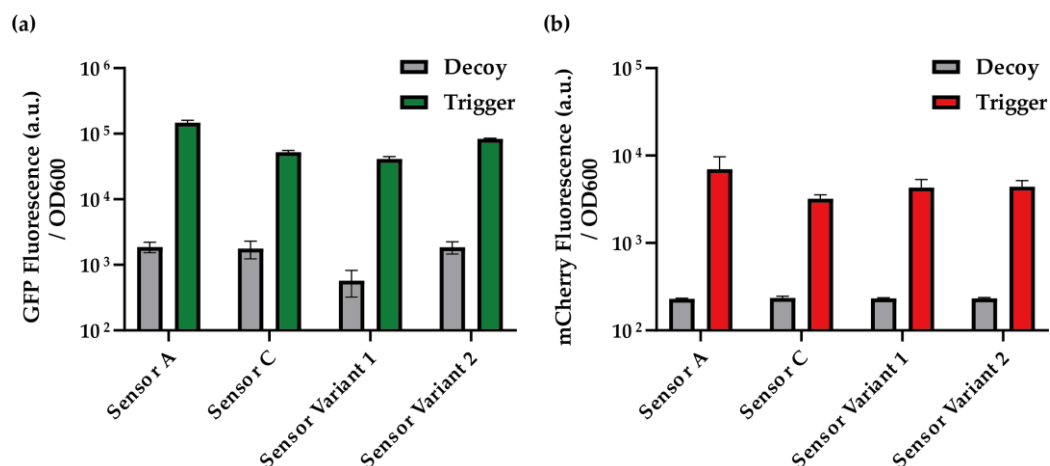

**Supplementary Figure S1.** *mCherry* mRNA sensor variants tested in this study. Sensor A and Sensor C were adopted from the previous research [5]. Among four sensors, sensor C and sensor variant 1 were selected for further helper tests. 0.2% (*w/v*) Arabinose was treated for induction of T7 RNA polymerase in *E. coli* BL21 AI strain. GFP and mCherry fluorescence were measured on the microplate reader (error bars indicate  $\pm$ SD).

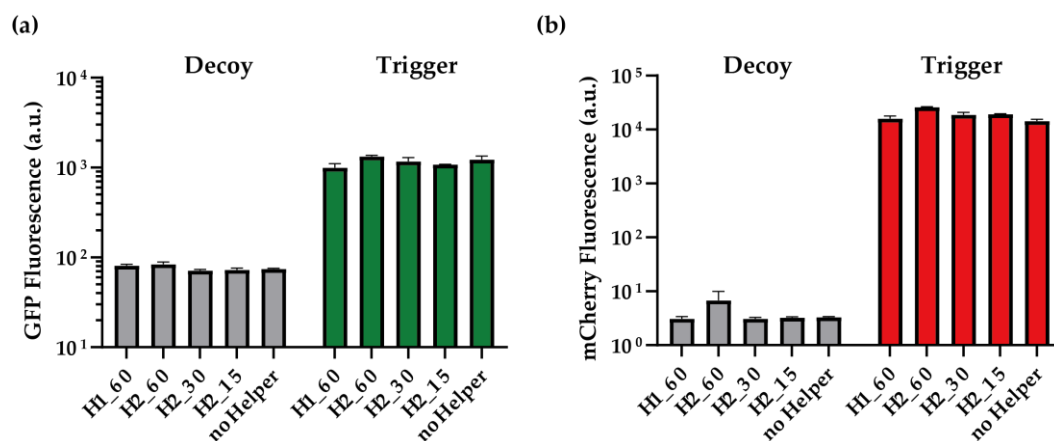

**Supplementary Figure S2.** Performance of *mCherry* sensor variant 1 with helper RNAs. H1 and H2 mean a helper RNA strand that stretching the upstream or downstream of a target site, respectively, and the following number means the length of the helper, 60, 30, and 15 nt. 0.2% (*w/v*) Arabinose was treated for induction of T7 RNA polymerases in *E. coli* BL21 AI strain. GFP and mCherry fluorescence were measured on flow cytometry (error bars indicate  $\pm$ SD).



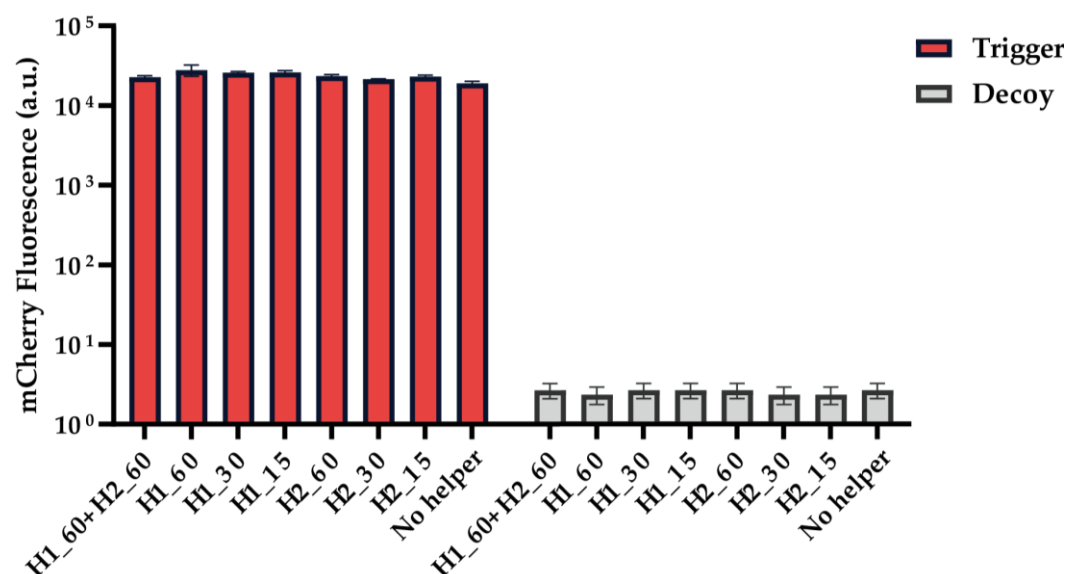

**Supplementary Figure S3.** mCherry expression levels in the presence of helper RNA variants. No significant inhibition of mCherry mRNA translation was observed regardless of the length or position of helper RNAs. H1 and H2 mean a helper that stretching the upstream or downstream of a toehold switch target site, respectively, and the following number means the length of the helper, 60, 30, and 15 nt. 0.2% (*w/v*) Arabinose was treated for induction, and GFP and mCherry fluorescence were measured on flow cytometry (error bars indicate  $\pm$ SD).

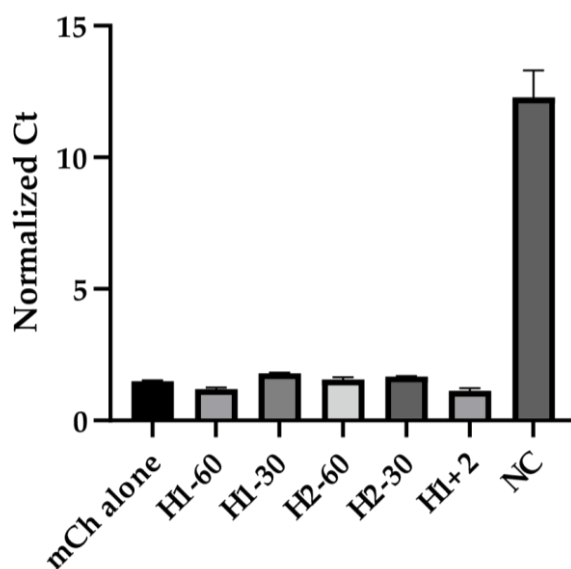

**Supplementary Figure S4.** RT-qPCR data for *mCherry* mRNA levels. 16s rRNA was selected as reference RNA for normalization of Ct values. *mCherry* mRNA amount was not significantly changed when it was compared to no helper (*mCherry* only) sample. Primer sequences used are listed in Table S10 (error bars indicate  $\pm$ SEM).

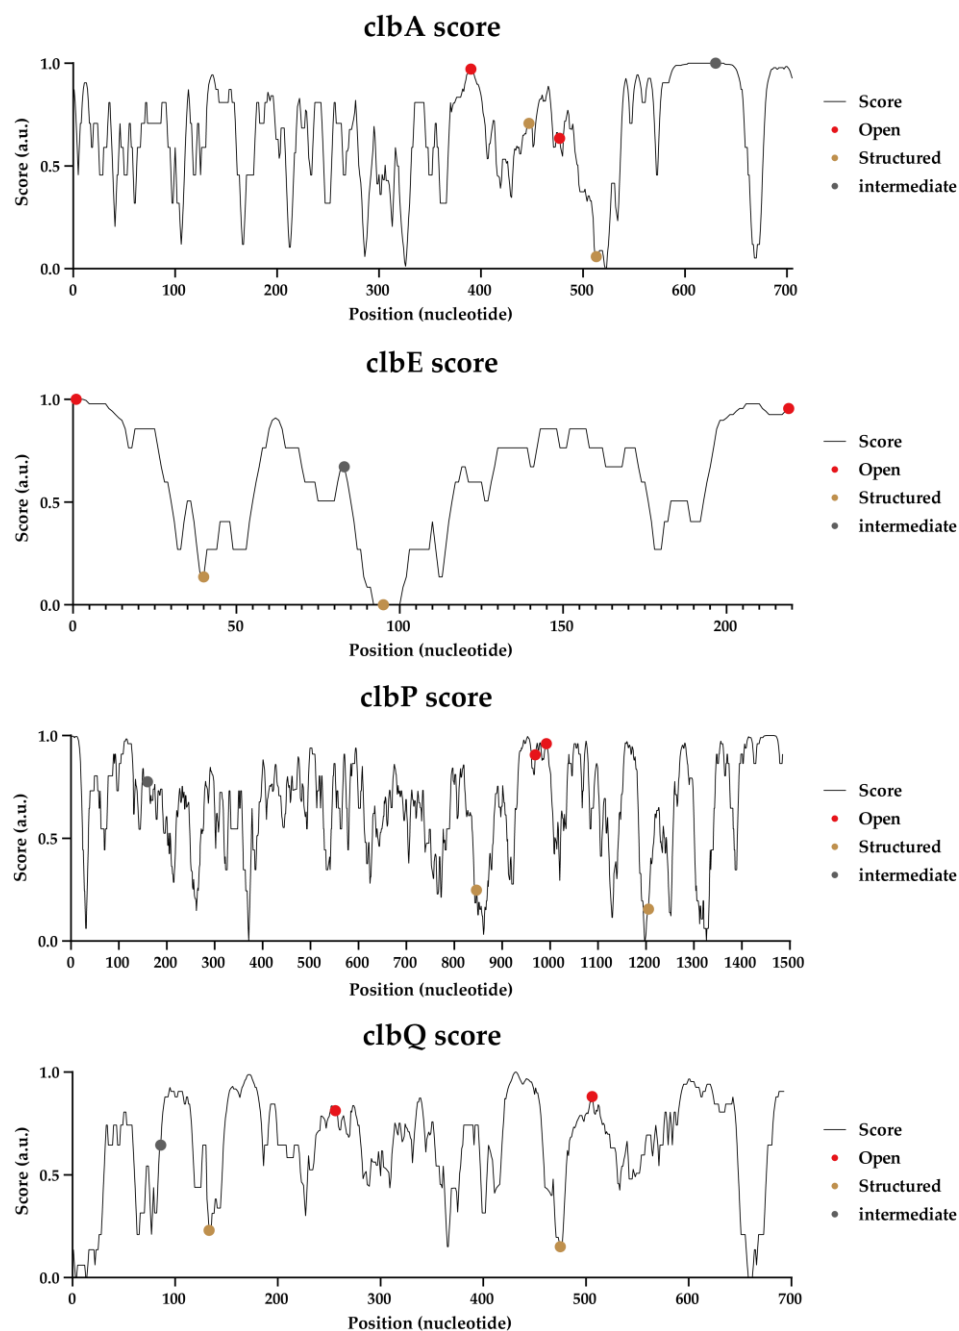

**Supplementary Figure S5.** Accessibility calculation of *clbA*, *clbE*, *clbP*, and *clbQ*. High score means highly single-stranded and low score means highly structured. Each point indicates the start position of the target region on a designed sensor. Color of the dot indicates the type of sensor; red: open structure, brown: highly structured, and gray: intermediate region.

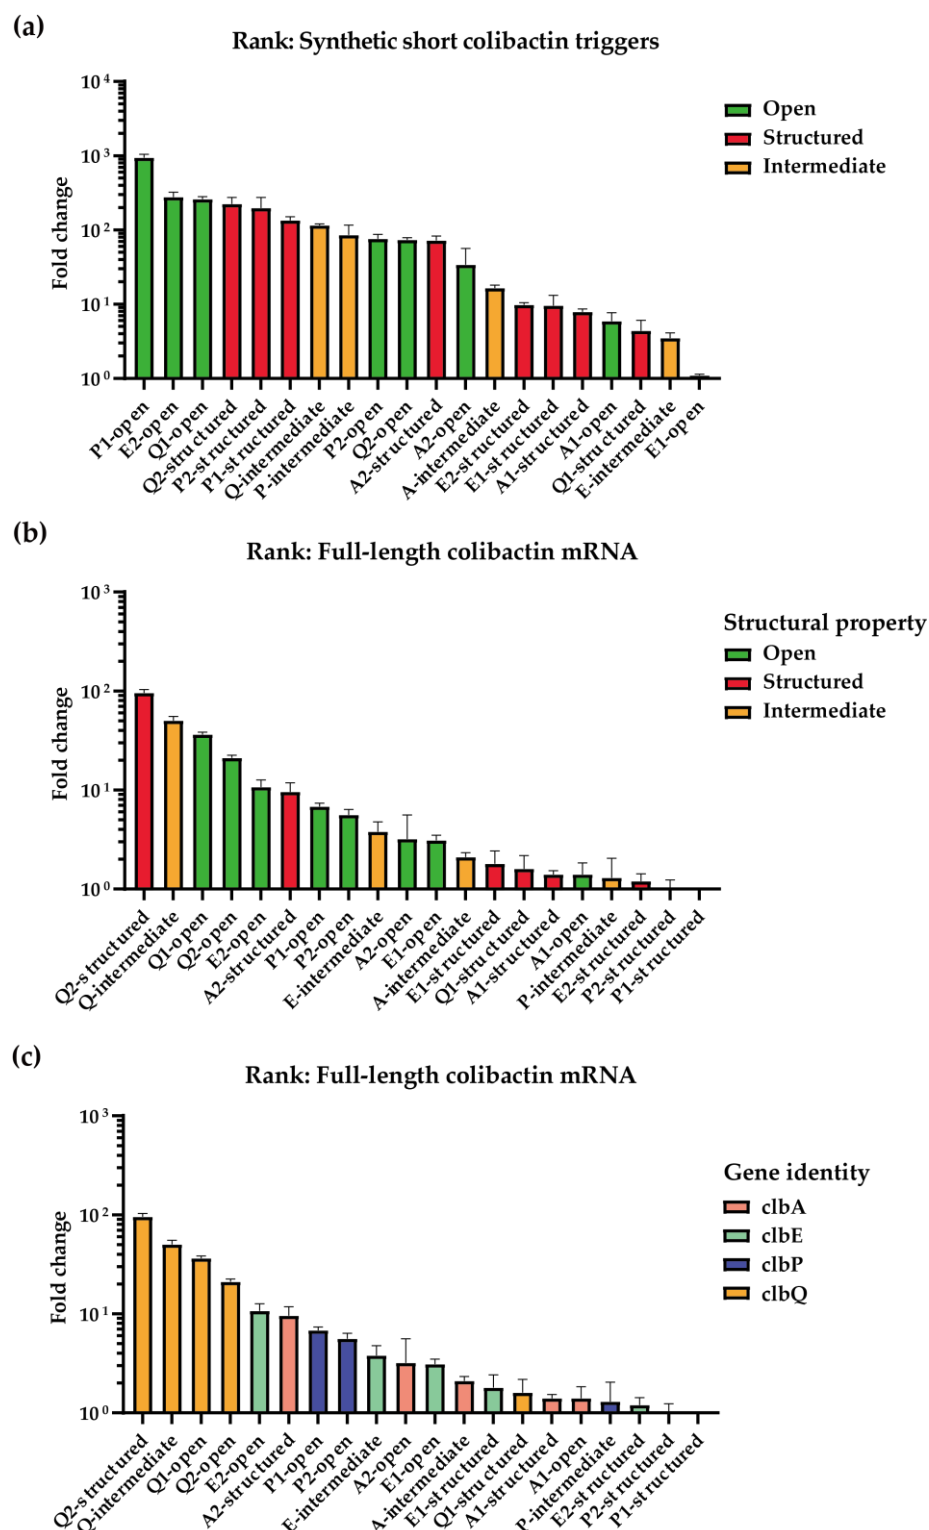

**Supplementary Figure S6.** In vivo performance of *clb* mRNA sensors. When cognate short triggers were treated, there were no significant difference between open region targeting sensors, close region targeting sensors and intermediated region targeting sensors was observed. However, when cognate full-length mRNAs were treated with sensors, open region targeting sensors generally showed higher performance (error bars indicate  $\pm$ SEM).

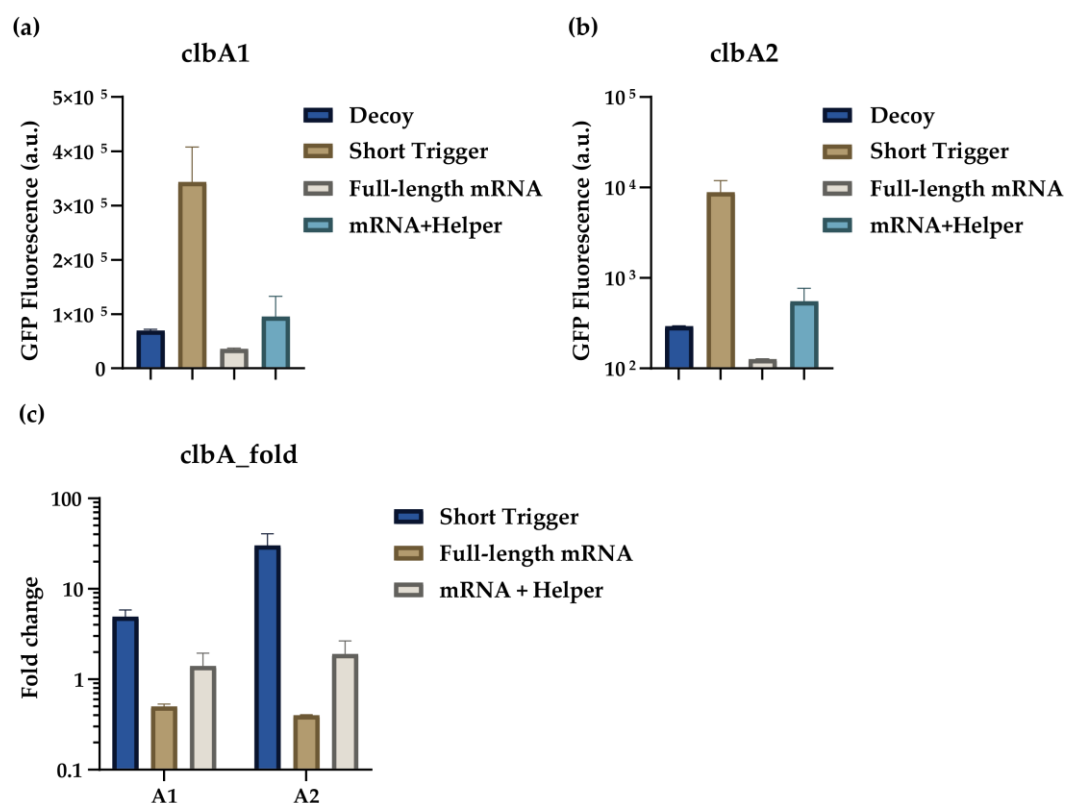

**Supplementary Figure S7.** In vivo performance of *clbA* open sensors with helper RNAs. Although *clbA1* (open) and *clbA2* (open) sensors worked well with synthetic short triggers but did not detect a full-length mRNA. Fold change was partly restored by introducing helper RNAs (error bars indicate  $\pm$ SEM).

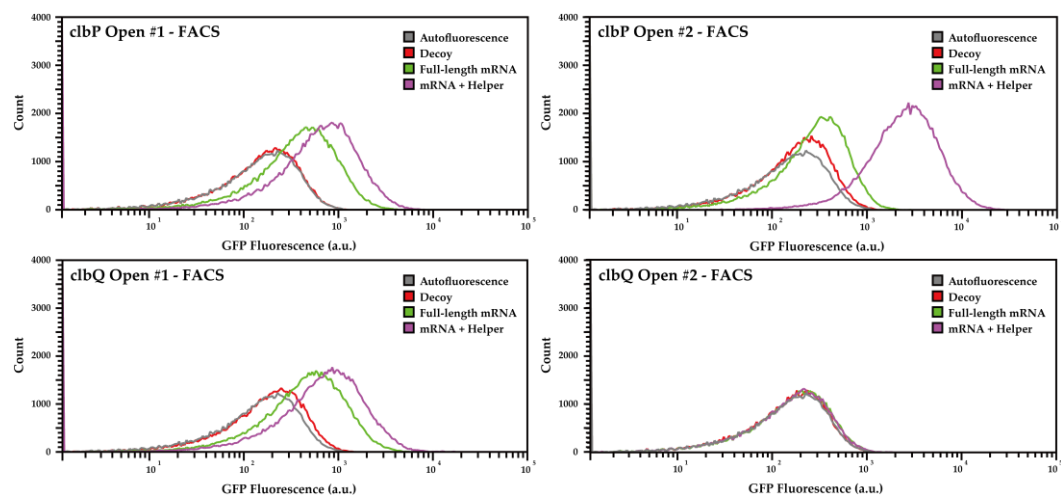

**Supplementary Figure S8.** Flow cytometry data for *clbP* and *clbQ* open sensors with helper RNAs. Cell population was unimodal, and GFP fluorescence increased with the introduction of helper RNAs. In all in vivo experiments, the number of biological replicates is three, and the figure showed a representative case.

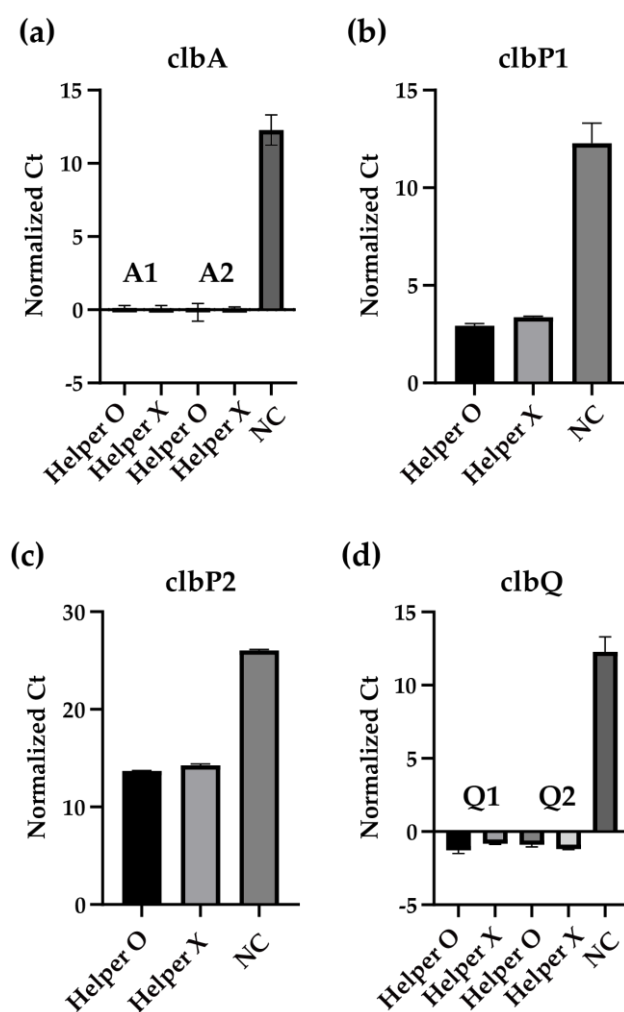

**Supplementary Figure S9.** RT-qPCR data for colibactin mRNA levels. 16s rRNA (for *clbA*, *clbP1* and *clbQ*) or *CysG* (*clbP2*) were selected as reference RNA for normalization of Ct values. No significant change of target mRNA amount was observed between 'without helper' samples and 'with helper' samples. Primer sequences used are listed in Table S10 (error bars indicate  $\pm$ SEM).

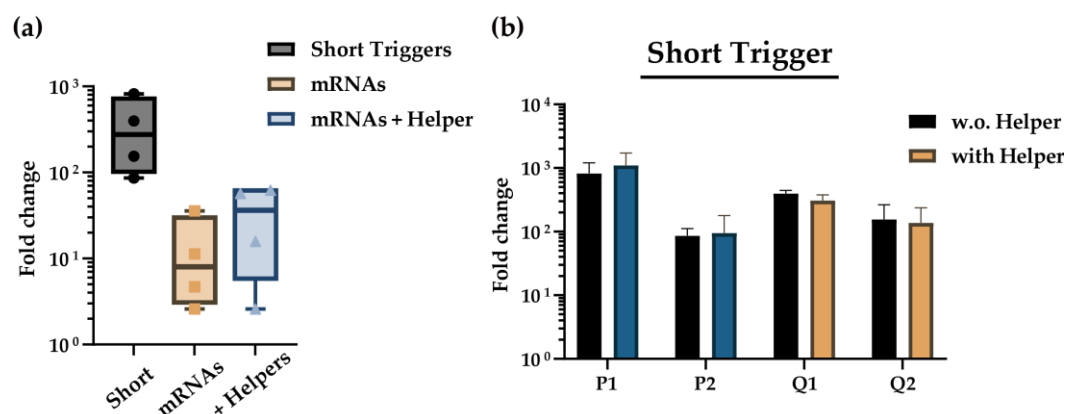

**Supplementary Figure S10.** In vivo performance of *clbP* and *clbQ* open sensors with short triggers and helper RNAs. (a) The sensing ability of toehold switch sensors was reduced in the full-length mRNA compared to synthetic short trigger. However, it was partially restored with the introduction of helper RNAs. (b) The sensing ability against synthetic short trigger was not affected by helper RNAs (error bars indicate  $\pm$ SEM).

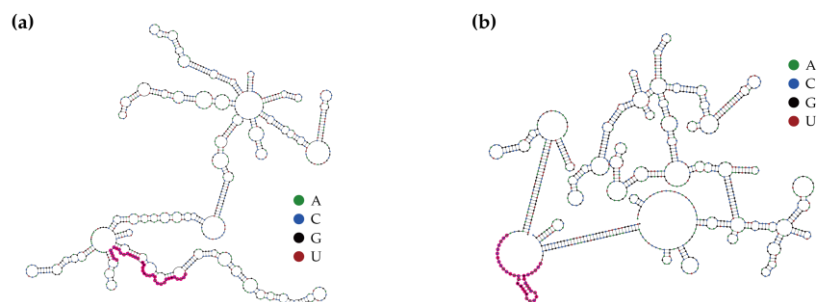

**Supplementary Figure S11.** Predicted MFE structures for *mCherry* mRNA without (a) and with (b) helper RNAs. Target sequences for toehold sensors are highlighted with pink. NUPACK was used to calculate MFE structures for each complex.

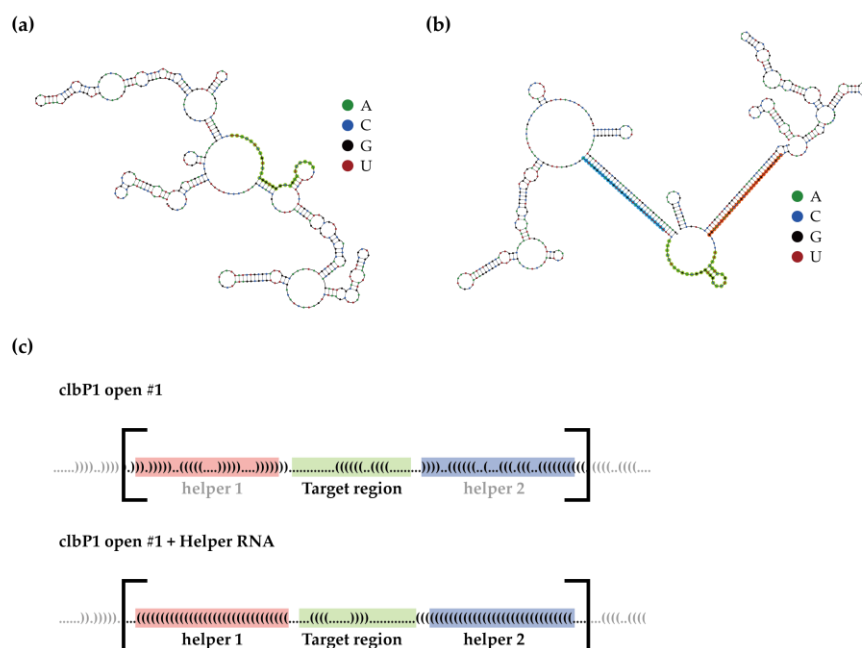

**Supplementary Figure S12.** Predicted MFE structure for *clb* mRNAs without and with helper RNAs. (a) *clbP* mRNA without helper RNAs for *clbP* open 1 sensor. (b) *clbP* mRNA with helper RNAs for *clbP* open1 sensor. (c) Dot-bracket model-expressed secondary structure of *clbP* open 1 sensor targeting *clbP* mRNA without or with helper RNAs. NUPACK was used to calculate MFE structures for each complex.

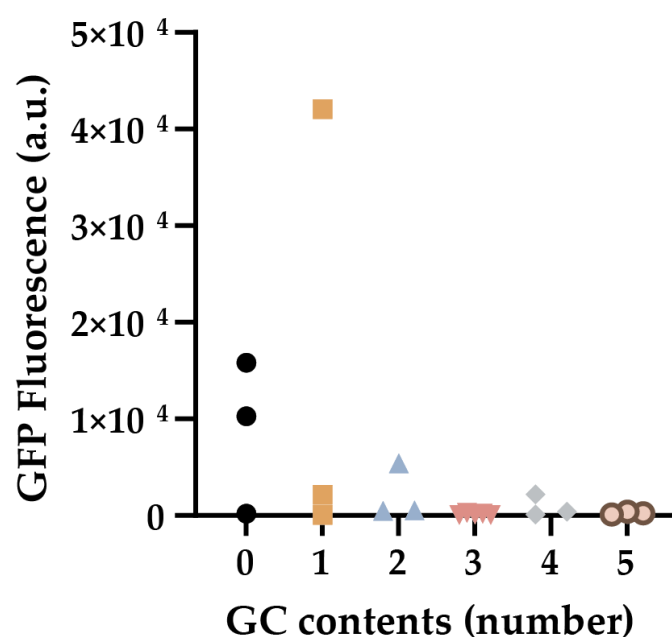

**Supplementary Figure S13.** The OFF-state fluorescence of *clb* sensors and the GC content of lower stem. The two cases showing highest leakages have 0 or 1 GC base-pair. The first one was *clbA* open Scheme 1. and the second one was *clbE* open sensor 1.

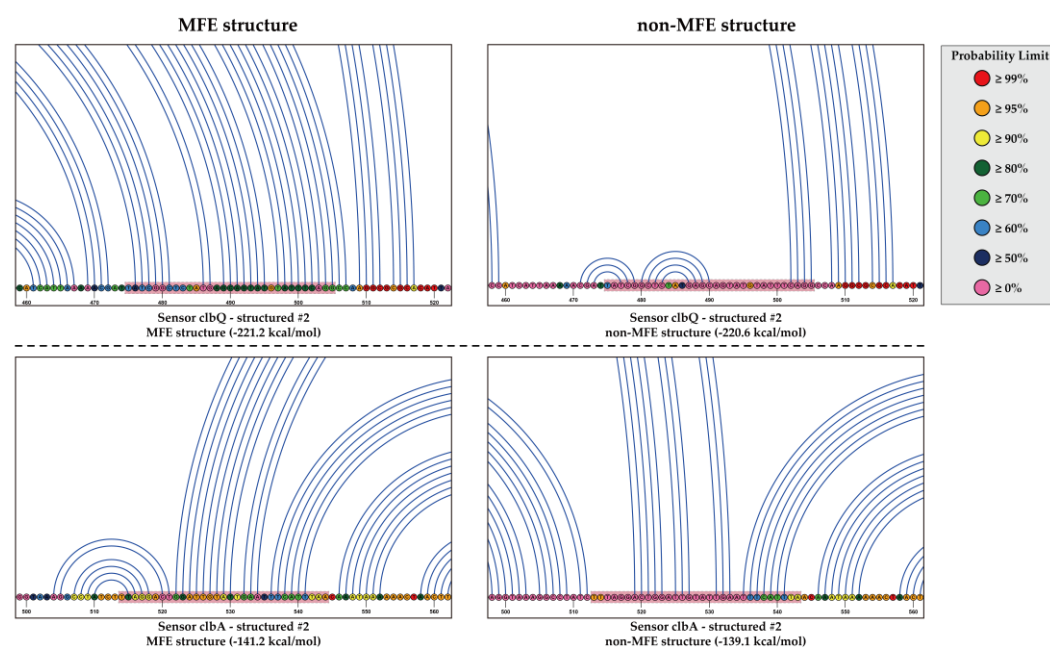

**Supplementary Figure S14.** Predicted alternative secondary structures for *clbQ* and *clbA* mRNAs. Secondary structure nearby target site (emphasized with red box) is dramatically changed with a small energy penalty. Structures were calculated using the RNAstructure 6.2 [6,7] to figure out non-minimum free energy (MFE) structures.

## References

1. Quan, J.; Tian, J. Circular polymerase extension cloning for high-throughput cloning of complex and combinatorial DNA libraries. *Nat Protoc* **2011**, *6*, 242–251, doi:10.1038/nprot.2010.181.
2. Gibson, D.G.; Young, L.; Chuang, R.-Y.; Venter, J.C.; Hutchison, C.A.; Smith, H.O. Enzymatic assembly of DNA molecules up to several hundred kilobases. *Nature methods* **2009**, *6*, 343–345.
3. Liu, H.; Naismith, J.H. An efficient one-step site-directed deletion, insertion, single and multiple-site plasmid mutagenesis protocol. *BMC Biotechnol* **2008**, *8*, 91, doi:10.1186/1472-6750-8-91.
4. Andersen, J.B.; Sternberg, C.; Poulsen, L.K.; Bjørn, S.P.; Givskov, M.; Molin, S. New unstable variants of green fluorescent protein for studies of transient gene expression in bacteria. *Applied and environmental microbiology* **1998**, *64*, 2240–2246.
5. Green, A.A.; Silver, P.A.; Collins, J.J.; Yin, P. Toehold switches: de-novo-designed regulators of gene expression. *Cell* **2014**, *159*, 925–939, doi:10.1016/j.cell.2014.10.002.
6. Reuter, J.S.; Mathews, D.H. RNAstructure: software for RNA secondary structure prediction and analysis. *BMC Bioinformatics* **2010**, *11*, 129, doi:10.1186/1471-2105-11-129.
7. Mathews, D.H.; Disney, M.D.; Childs, J.L.; Schroeder, S.J.; Zuker, M.; Turner, D.H. Incorporating chemical modification constraints into a dynamic programming algorithm for prediction of RNA secondary structure. *Proc Natl Acad Sci U S A* **2004**, *101*, 7287–7292, doi:10.1073/pnas.0401799101.
